# Supplementary material
Source: publisher figshare collection journal article supplement (https://gsajournals.figshare.com/ndownloader/files/27537608)
Supplement: Supplementary file 1 [file 27537608]

## Sheet: Table of Contents
Table S1: Functional genomic screening results examining defects in morphogenesis in response to geldanamycin.
Name	Description
GdA Morphology Scores	List of morphology scores for individual GRACE strains in response to geldanamycin from the primary screen
322 Primary Hits	List of GRACE strains that were defective in filamentation along with their morphology scores
201 hits <50% inhibiton in DOX	List of GRACE strains capable of proliferating in the presence of doxycycline
54 hits <60% inhibtion GdA+DOX	List of GRACE starins with increased growth in geldanamycin and doxycycline relative to wild-type

## Sheet: GdA morphology scores
GdA morphology indicates the scale of filamentation of the strain grown in the presence of 10 µM GdA for 6 hours in the arrayed screen (where 0=yeast, 3=filamentous)
GdA plus DOX morphology indicates the scale of filamentation when grown in YPD + 0.05μg/mL DOX with 10 µM GdA for 6 hours in the arrayed screen (where 0=yeast, 3=filamentous)
orf19	Common	Plate	Position	GdA morphology	GdA +DOX morphology
orf19.5507	ENP1	Plate 01	A01	3	3
orf19.4194		Plate 01	A02	3	3
orf19.665	NEP1	Plate 01	A03	3	3
orf19.2884	CDC68	Plate 01	A04	3	3
orf19.2314		Plate 01	A05	3	3
orf19.275		Plate 01	A06	3	2
orf19.1199	NOP5	Plate 01	A07	3	0
orf19.3243	SRP54	Plate 01	A08	3	1
orf19.1221	ALG2	Plate 01	A09	3	3
orf19.6217	PGA63	Plate 01	A10	3	0
orf19.7041		Plate 01	A11	3	3
orf19.6820		Plate 01	A12	3	3
orf19.5531	CDC37	Plate 01	B01	3	3
orf19.2002		Plate 01	B02	3	3
orf19.2712	HCA4	Plate 01	B03	3	2
orf19.7291		Plate 01	B04	3	2
orf19.6026	ERG2	Plate 01	B05	3	2
orf19.767	ERG3	Plate 01	B06	3	3
orf19.1031	HMG1	Plate 01	B07	3	1
orf19.6199		Plate 01	B08	3	3
orf19.5901	PKC1	Plate 01	B09	3	3
orf19.6716	ABD1	Plate 01	B10	3	3
orf19.3001	TEM1	Plate 01	B11	3	3
orf19.6151	ARC15	Plate 01	B12	3	0
orf19.274	TFC4	Plate 01	C01	3	2
orf19.5360	RPC11	Plate 01	C02	3	1
orf19.759		Plate 01	C03	2	2
orf19.6862		Plate 01	C04	3	3
orf19.1815		Plate 01	C05	3	3
orf19.5013	AGM1	Plate 01	C06	3	3
orf19.2937	PMM1	Plate 01	C07	3	3
orf19.7234		Plate 01	C08	3	3
orf19.5912	MAK21	Plate 01	C09	3	3
orf19.4427	SKP1	Plate 01	C10	3	3
orf19.7119	RAD3	Plate 01	C11	3	3
orf19.1387		Plate 01	C12	3	3
orf19.1975		Plate 01	D01	3	3
orf19.6860		Plate 01	D02	2	3
orf19.2835		Plate 01	D03	3	3
orf19.3593	RPT6	Plate 01	D04	3	3
orf19.1295	VAS1	Plate 01	D05	NA	NA
orf19.1267.1		Plate 01	D06	3	3
orf19.4640	PWP1	Plate 01	D07	2	2
orf19.5691	CDC11	Plate 01	D08	3	3
orf19.7392		Plate 01	D09	3	2
orf19.4903		Plate 01	D10	3	3
orf19.2559	CDC4	Plate 01	D11	3	3
orf19.3761	CDC54	Plate 01	D12	3	3
orf19.7064	GLN4	Plate 01	E01	3	0
orf19.4815	YTM1	Plate 01	E02	3	3
orf19.4641	NMT1	Plate 01	E03	3	3
orf19.3169		Plate 01	E04	3	3
orf19.3128		Plate 01	E05	3	3
orf19.3178		Plate 01	E06	3	3
orf19.7136	SPT6	Plate 01	E07	3	3
orf19.1164	GAR1	Plate 01	E08	3	3
orf19.122	CDC20	Plate 01	E09	2	3
orf19.1304		Plate 01	E10	3	3
orf19.4851	TFA1	Plate 01	E11	3	3
orf19.107	DHR2	Plate 01	E12	3	2
orf19.7101		Plate 01	F01	3	3
orf19.2847		Plate 01	F02	3	1
orf19.542.2	MIM1	Plate 01	F03	3	3
orf19.3366	CSH3	Plate 01	F04	3	3
orf19.4388		Plate 01	F05	3	3
orf19.6025	alg13	Plate 01	F06	3	3
orf19.6014	RRS1	Plate 01	F07	3	3
orf19.4382		Plate 01	F08	3	NA
orf19.2504	BMS1	Plate 01	F09	3	1
orf19.1591	ERG10	Plate 01	F10	3	1
orf19.2365	POL2	Plate 01	F11	3	3
orf19.7384	NOG1	Plate 01	F12	3	1
orf19.3129		Plate 01	G01	2	NA
orf19.4192	CDC14	Plate 01	G02	3	3
orf19.1738	UGP1	Plate 01	G03	1	NA
orf19.2216	PDS5	Plate 01	G04	3	3
orf19.7413	MMS21	Plate 01	G05	3	3
orf19.4005		Plate 01	G06	3	2
orf19.5379	ERG4	Plate 01	G07	1	1
orf19.4089	SGT1	Plate 01	G08	3	3
orf19.7255	RPC10	Plate 01	G09	3	2
orf19.6345	RPG1A	Plate 01	G10	2	1
orf19.4616	POL30	Plate 01	G11	3	3
orf19.1672		Plate 01	G12	3	0
orf19.4987	NUP49	Plate 01	H01	3	3
orf19.6099	CCT8	Plate 01	H02	3	NA
orf19.6422	SSY5	Plate 01	H03	3	2
orf19.1631	ERG6	Plate 01	H04	3	0
orf19.4346		Plate 01	H05	3	2
orf19.1915	MPP10	Plate 01	H06	3	2
orf19.6171		Plate 01	H07	3	2
orf19.2116	NAT2	Plate 01	H08	3	3
orf19.4435		Plate 01	H09	3	3
orf19.4377	KRE1	Plate 01	H10	3	3
orf19.7363	KRE6	Plate 01	H11	3	3
orf19.5861	KRE9	Plate 01	H12	3	0
orf19.1607	ALR1	Plate 02	A01	3	2
orf19.5221		Plate 02	A02	3	3
orf19.5093		Plate 02	A03	3	2
orf19.1077	ATM1	Plate 02	A04	3	3
orf19.3341		Plate 02	A05	3	0
orf19.6818		Plate 02	A06	3	3
orf19.418	KOG1	Plate 02	A07	3	0
orf19.6356		Plate 02	A08	3	3
orf19.1192	DNA2	Plate 02	A09	2	2
orf19.878	NBN1	Plate 02	A10	3	3
orf19.4336	RPS5	Plate 02	A11	1	0
orf19.7655	RPO21	Plate 02	A12	3	2
orf19.6074	HBR1	Plate 02	B01	3	3
orf19.6925	HTB1	Plate 02	B02	3	3
orf19.2760		Plate 02	B03	3	1
orf19.5577		Plate 02	B04	3	0
orf19.3955	MES1	Plate 02	B05	3	0
orf19.4956	RPN1	Plate 02	B06	3	2
orf19.2778		Plate 02	B07	3	3
orf19.3301		Plate 02	B08	3	3
orf19.6559		Plate 02	B09	3	3
orf19.5178	ERG5	Plate 02	B10	3	2
orf19.1649	RNA1	Plate 02	B11	3	3
orf19.3996		Plate 02	B12	3	3
orf19.5143	TIM54	Plate 02	C01	3	1
orf19.4015	CAG1	Plate 02	C02	3	3
orf19.6294	MYO1	Plate 02	C03	2	3
orf19.1598	ERG24	Plate 02	C04	3	0
orf19.2873	TOP2	Plate 02	C05	3	3
orf19.4451	RIA1	Plate 02	C06	3	3
orf19.1110		Plate 02	C07	3	3
orf19.3704		Plate 02	C08	3	3
orf19.3796	DCR1	Plate 02	C09	3	3
orf19.5991		Plate 02	C10	3	2
orf19.7529	EPL1	Plate 02	C11	3	2
orf19.3177		Plate 02	C12	3	1
orf19.2330		Plate 02	D01	3	0
orf19.5608		Plate 02	D02	3	1
orf19.5650	PRO3	Plate 02	D03	3	3
orf19.586	ERV46	Plate 02	D04	3	3
orf19.5825	NCB2	Plate 02	D05	3	3
orf19.7081	SPL1	Plate 02	D06	3	1
orf19.4258		Plate 02	D07	3	3
orf19.6541	RPL5	Plate 02	D08	2	1
orf19.5465		Plate 02	D09	3	3
orf19.3087	UBI3	Plate 02	D10	1	0
orf19.5693		Plate 02	D11	2	1
orf19.2013	KAR2	Plate 02	D12	3	0
orf19.2029	RFC5	Plate 02	E01	3	3
orf19.2084	CDH1	Plate 02	E02	3	3
orf19.1229		Plate 02	E03	3	3
orf19.5188	CHS1	Plate 02	E04	3	2
orf19.2407	DPS1-1	Plate 02	E05	3	0
orf19.5597	POL5	Plate 02	E06	3	2
orf19.5148	CYR1	Plate 02	E07	3	3
orf19.3859		Plate 02	E08	3	3
orf19.2215	GLE1	Plate 02	E09	3	2
orf19.6568	SMC6	Plate 02	E10	3	3
orf19.6828		Plate 02	E11	3	1
orf19.2233	PRE2	Plate 02	E12	3	2
orf19.6213	SUI2	Plate 02	F01	3	0
orf19.5779	RNR1	Plate 02	F02	3	2
orf19.6640	TPS1	Plate 02	F03	3	3
orf19.709	PUP2	Plate 02	F04	3	2
orf19.6432		Plate 02	F05	3	3
orf19.5226	WRS1	Plate 02	F06	3	0
orf19.819		Plate 02	F07	3	3
orf19.2629		Plate 02	F08	3	1
orf19.4697	MDN1	Plate 02	F09	3	3
orf19.3696	TOM22	Plate 02	F10	3	1
orf19.3130		Plate 02	F11	3	3
orf19.3098		Plate 02	F12	3	0
orf19.6438	LCB1	Plate 02	G01	3	0
orf19.6105	MVD	Plate 02	G02	3	0
orf19.3168	RPN8	Plate 02	G03	3	2
orf19.2761		Plate 02	G04	3	3
orf19.5487	CDC46	Plate 02	G05	3	2
orf19.4635	NIP1	Plate 02	G06	1	0
orf19.6936	RAD53	Plate 02	G07	3	3
orf19.2369		Plate 02	G08	3	3
orf19.2404		Plate 02	G09	3	1
orf19.941	SEC14	Plate 02	G10	3	1
orf19.1902	NOC4	Plate 02	G11	3	0
orf19.4746	JIP5	Plate 02	G12	3	2
orf19.7035	RFC2	Plate 02	H01	3	3
orf19.2313		Plate 02	H02	3	3
orf19.3447		Plate 02	H03	3	3
orf19.7264		Plate 02	H04	3	3
orf19.4491	ERG20	Plate 02	H05	3	0
orf19.5765		Plate 02	H06	3	1
orf19.4230		Plate 02	H07	3	3
orf19.3055	MED17	Plate 02	H08	3	3
orf19.5163	SFI1	Plate 02	H09	3	3
orf19.1839	RPA190	Plate 02	H10	3	0
orf19.5746	ALA1	Plate 02	H11	3	0
orf19.6942	ORC3	Plate 02	H12	3	3
orf19.3651	PGK1	Plate 03	A01	3	1
orf19.2260		Plate 03	A02	3	1
orf19.3561	CDC7	Plate 03	A03	3	3
orf19.6046	APC1	Plate 03	A04	3	1
orf19.3058		Plate 03	A05	3	2
orf19.4585	TFG1	Plate 03	A06	3	3
orf19.6075		Plate 03	A07	3	3
orf19.7062	RPA135	Plate 03	A08	3	1
orf19.3265	TRM1	Plate 03	A09	3	3
orf19.3451	TRA1	Plate 03	A10	3	3
orf19.6926	CSC25	Plate 03	A11	3	3
orf19.5516		Plate 03	A12	3	1
orf19.1232	VRG4	Plate 03	B01	3	3
orf19.5947	SEC7	Plate 03	B02	3	1
orf19.7215		Plate 03	B03	3	1
orf19.7232	IRR1	Plate 03	B04	3	3
orf19.1491		Plate 03	B05	3	3
orf19.3062		Plate 03	B06	3	2
orf19.7227		Plate 03	B07	3	3
orf19.1633	UTP4	Plate 03	B08	3	2
orf19.7645		Plate 03	B09	3	3
orf19.2641	ARP1	Plate 03	B10	3	3
orf19.5895		Plate 03	B11	3	3
orf19.6707		Plate 03	B12	3	3
orf19.6168		Plate 03	C01	3	3
orf19.7184		Plate 03	C02	2	3
orf19.4941	TYE7	Plate 03	C03	3	3
orf19.4414		Plate 03	C04	3	3
orf19.7567		Plate 03	C05	3	3
orf19.5067		Plate 03	C06	3	3
orf19.2671		Plate 03	C07	3	3
orf19.7073		Plate 03	C08	3	3
orf19.2653		Plate 03	C09	3	3
orf19.3466		Plate 03	C10	3	3
orf19.1125		Plate 03	C11	3	3
orf19.3434	TRY5	Plate 03	C12	3	3
orf19.645	HGT9	Plate 03	D01	2	3
orf19.703		Plate 03	D02	3	2
orf19.3560	MRPS35	Plate 03	D03	1	0
orf19.4686		Plate 03	D04	3	3
orf19.3536		Plate 03	D05	3	3
orf19.2659	UCF1	Plate 03	D06	3	3
orf19.6660		Plate 03	D07	3	3
orf19.5629	QCR7	Plate 03	D08	2	0
orf19.7150	NRG1	Plate 03	D09	NA	NA
orf19.4730		Plate 03	D10	3	3
orf19.4528		Plate 03	D11	3	3
orf19.6133	PIF1	Plate 03	D12	3	3
orf19.1479		Plate 03	E01	3	3
orf19.4629		Plate 03	E02	3	3
orf19.6200		Plate 03	E03	3	3
orf19.5812		Plate 03	E04	3	3
orf19.4023	MRP2	Plate 03	E05	3	3
orf19.585	MRPL17	Plate 03	E06	3	0
orf19.7017	YOX1	Plate 03	E07	3	3
orf19.3406		Plate 03	E08	3	3
orf19.6055		Plate 03	E09	3	3
orf19.811		Plate 03	E10	3	3
orf19.297	DTD2	Plate 03	E11	3	3
orf19.4294		Plate 03	E12	3	3
orf19.6515	HSP90	Plate 03	F01	3	3
orf19.5934		Plate 03	F02	3	2
orf19.2706	CRH11	Plate 03	F03	2	3
orf19.2075	DFG5	Plate 03	F04	3	3
orf19.3823	ZDS1	Plate 03	F05	3	3
orf19.4366		Plate 03	F06	3	3
orf19.7484	ADE1	Plate 03	F07	3	3
orf19.6364	VSP21	Plate 03	F08	3	3
orf19.4937	CHS3	Plate 03	F09	3	3
orf19.4255	ECM331	Plate 03	F10	3	3
orf19.1289	SCT1	Plate 03	F11	3	3
orf19.7523	MKC1	Plate 03	F12	3	3
orf19.5505	HIS7	Plate 03	G01	3	3
orf19.158		Plate 03	G02	3	3
orf19.2655	BUB3	Plate 03	G03	3	3
orf19.2678	BUB1	Plate 03	G04	3	3
orf19.2283	DQD1	Plate 03	G05	3	1
orf19.1119	MTR10	Plate 03	G06	3	3
orf19.3548		Plate 03	G07	3	3
orf19.3952		Plate 03	G08	3	3
orf19.847	YIM1	Plate 03	G09	3	3
orf19.3173		Plate 03	G10	3	3
orf19.642		Plate 03	G11	3	3
orf19.4798		Plate 03	G12	3	2
orf19.5634	FRP1	Plate 03	H01	3	3
orf19.2426		Plate 03	H02	3	3
orf19.6832		Plate 03	H03	3	3
orf19.2876	CBF1	Plate 03	H04	3	3
orf19.3442		Plate 03	H05	3	3
orf19.6685	ISY1	Plate 03	H06	3	3
orf19.4014		Plate 03	H07	3	3
orf19.3612	PST2	Plate 03	H08	3	3
orf19.1310		Plate 03	H09	3	3
orf19.412	SSH1	Plate 03	H10	3	3
orf19.4309	GRP2	Plate 03	H11	3	3
orf19.1264	CFL2	Plate 03	H12	3	3
orf19.3505		Plate 04	A01	3	2
orf19.4347		Plate 04	A02	3	2
orf19.1763	IFR1	Plate 04	A03	3	2
orf19.2753	ZCF15	Plate 04	A04	3	3
orf19.99	HAL21	Plate 04	A05	3	3
orf19.4939		Plate 04	A06	3	3
orf19.2006		Plate 04	A07	3	3
orf19.169	CHO2	Plate 04	A08	3	3
orf19.246		Plate 04	A09	3	3
orf19.5826		Plate 04	A10	3	3
orf19.5087	BUD6	Plate 04	A11	3	3
orf19.1995	MNN24	Plate 04	A12	3	3
orf19.6094	VPS53	Plate 04	B01	3	0
orf19.1422	FZO1	Plate 04	B02	3	0
orf19.4231	PTH2	Plate 04	B03	3	3
orf19.5915	DUR35	Plate 04	B04	3	3
orf19.2958		Plate 04	B05	3	3
orf19.5655		Plate 04	B06	3	3
orf19.405	VCX1	Plate 04	B07	3	3
orf19.2690		Plate 04	B08	3	2
orf19.4208	RAD52	Plate 04	B09	3	3
orf19.5639	HIS4	Plate 04	B10	3	2
orf19.3273		Plate 04	B11	3	3
orf19.3071	MIH1	Plate 04	B12	3	3
orf19.3213		Plate 04	C01	3	3
orf19.7161	SUI3	Plate 04	C02	2	NA
orf19.3803	MNN22	Plate 04	C03	3	3
orf19.1910		Plate 04	C04	3	1
orf19.7444		Plate 04	C05	3	2
orf19.260	SLD1	Plate 04	C06	3	3
orf19.2842	GZF3	Plate 04	C07	3	3
orf19.551		Plate 04	C08	3	3
orf19.5499		Plate 04	C09	3	3
orf19.5595	SHE3	Plate 04	C10	2	3
orf19.667		Plate 04	C11	3	3
orf19.6952		Plate 04	C12	3	2
orf19.7105	FAR1	Plate 04	D01	3	2
orf19.1156	FUS1	Plate 04	D02	3	2
orf19.4525		Plate 04	D03	3	3
orf19.4496		Plate 04	D04	3	3
orf19.3581		Plate 04	D05	3	3
orf19.789	PYC2	Plate 04	D06	3	3
orf19.972		Plate 04	D07	3	3
orf19.7459		Plate 04	D08	3	1
orf19.1587	HGT20	Plate 04	D09	3	3
orf19.7069		Plate 04	D10	3	3
orf19.3608		Plate 04	D11	3	3
orf19.5735	CDC50	Plate 04	D12	3	0
orf19.7678	ATP16	Plate 04	E01	3	0
orf19.831		Plate 04	E02	3	3
orf19.1069	RPN4	Plate 04	E03	3	3
orf19.1756	GPD1	Plate 04	E04	3	3
orf19.7245		Plate 04	E05	3	3
caydl037c		Plate 04	E06	3	3
orf19.4761	HST1	Plate 04	E07	3	3
orf19.250	SLC1	Plate 04	E08	3	3
orf19.1564		Plate 04	E09	3	3
orf19.5323	MDH1-3	Plate 04	E10	3	3
orf19.5171	PMT1	Plate 04	E11	3	3
orf19.1548		Plate 04	E12	3	3
orf19.5627		Plate 04	F01	3	3
orf19.5117	OLE1	Plate 04	F02	2	3
orf19.829	SCH9	Plate 04	F03	3	3
orf19.6000	CDR1	Plate 04	F04	3	2
orf19.4809	ERG12	Plate 04	F05	3	0
orf19.2929	GSC1	Plate 04	F06	3	1
orf19.4152	CEF3	Plate 04	F07	2	0
orf19.7478		Plate 04	F08	3	3
orf19.5463	SEC6	Plate 04	F09	3	0
orf19.406	ERG1	Plate 04	F10	3	3
orf19.3174	CDC24	Plate 04	F11	3	0
orf19.5949	FAS2	Plate 04	F12	3	0
orf19.4882		Plate 04	G01	3	2
orf19.6511	LIG1	Plate 04	G02	3	0
orf19.5759	SNQ2	Plate 04	G03	3	3
orf19.3740	PGA23	Plate 04	G04	3	3
orf19.6034	TUB2	Plate 04	G05	3	NA
orf19.4618	FBA1	Plate 04	G06	3	0
orf19.7265		Plate 04	G07	3	3
orf19.7572	SPT7	Plate 04	G08	3	2
orf19.5364		Plate 04	G09	3	3
orf19.1011	MNN21	Plate 04	G10	3	2
orf19.136		Plate 04	G11	3	3
orf19.7124	RVS161	Plate 04	G12	3	3
orf19.5964	ARF2	Plate 04	H01	3	NA
orf19.4650	ILV6	Plate 04	H02	3	3
orf19.5808		Plate 04	H03	3	3
orf19.3792		Plate 04	H04	3	3
orf19.3363	VTC4	Plate 04	H05	3	3
orf19.6460	PEX1	Plate 04	H06	3	3
orf19.6804		Plate 04	H07	3	3
orf19.2281		Plate 04	H08	3	3
orf19.1306		Plate 04	H09	3	3
orf19.3539		Plate 04	H10	3	2
orf19.4930	SPC3	Plate 04	H11	3	0
orf19.6155		Plate 04	H12	3	NA
orf19.2462	PRN3	Plate 05	A01	3	3
orf19.5294	PDB1	Plate 05	A02	3	3
orf19.4927	BNI1	Plate 05	A03	3	3
orf19.2501	FLC1	Plate 05	A04	3	3
orf19.6323	HPA2	Plate 05	A05	3	3
orf19.5917	STP3	Plate 05	A06	3	3
orf19.639		Plate 05	A07	3	3
orf19.1862		Plate 05	A08	3	3
orf19.3533		Plate 05	A09	3	3
orf19.652		Plate 05	A10	3	3
orf19.696	STE2	Plate 05	A11	3	3
orf19.1528		Plate 05	A12	3	0
orf19.4816		Plate 05	B01	3	3
orf19.4887	ECM21	Plate 05	B02	3	3
orf19.1250		Plate 05	B03	3	NA
orf19.2934		Plate 05	B04	1	1
orf19.3367		Plate 05	B05	3	0
orf19.203	STB3	Plate 05	B06	3	3
orf19.6717		Plate 05	B07	3	3
orf19.7038		Plate 05	B08	3	3
orf19.414		Plate 05	B09	3	2
orf19.415		Plate 05	B10	3	3
orf19.4176		Plate 05	B11	3	0
orf19.386	SAM4	Plate 05	B12	3	3
orf19.6885	SPO7	Plate 05	C01	3	3
orf19.4357		Plate 05	C02	3	3
orf19.1533		Plate 05	C03	3	3
orf19.4844		Plate 05	C04	3	2
orf19.4866	CPP1	Plate 05	C05	3	3
orf19.5278	CMD2	Plate 05	C06	3	0
orf19.3022		Plate 05	C07	3	3
orf19.2199	PHO86	Plate 05	C08	3	3
orf19.2363		Plate 05	C09	2	3
orf19.6071		Plate 05	C10	3	3
orf19.7237		Plate 05	C11	3	3
orf19.6851	CHL4	Plate 05	C12	3	3
orf19.3659		Plate 05	D01	3	3
orf19.3263	ATO10	Plate 05	D02	3	3
orf19.3954		Plate 05	D03	2	2
orf19.4722		Plate 05	D04	3	2
orf19.4958	ECM25	Plate 05	D05	3	3
orf19.5270		Plate 05	D06	3	3
orf19.6029	ROT1	Plate 05	D07	3	NA
orf19.947	MRP17	Plate 05	D08	2	0
orf19.7385		Plate 05	D09	3	3
orf19.3624	MSU1	Plate 05	D10	3	1
orf19.3574	MDJ2	Plate 05	D11	3	3
orf19.3937		Plate 05	D12	1	1
orf19.4011		Plate 05	E01	3	3
orf19.6681		Plate 05	E02	3	3
orf19.5601		Plate 05	E03	3	3
orf19.612		Plate 05	E04	3	3
orf19.1773	RAP1	Plate 05	E05	3	3
orf19.2060	SOD5	Plate 05	E06	3	3
orf19.944	IFG3	Plate 05	E07	3	3
orf19.3282	BMT3	Plate 05	E08	3	3
orf19.3362		Plate 05	E09	2	2
orf19.5016		Plate 05	E10	3	3
orf19.1632		Plate 05	E11	2	3
orf19.2238	LTE1	Plate 05	E12	3	3
orf19.1681		Plate 05	F01	2	2
orf19.2303	FGR16	Plate 05	F02	3	3
orf19.2973		Plate 05	F03	3	3
orf19.2064		Plate 05	F04	3	3
orf19.2343	VPS23	Plate 05	F05	1	2
orf19.752		Plate 05	F06	3	3
orf19.1866	VMA10	Plate 05	F07	1	NA
orf19.3170		Plate 05	F08	3	2
orf19.4577		Plate 05	F09	3	3
orf19.5250		Plate 05	F10	3	3
orf19.3627		Plate 05	F11	3	3
orf19.2418		Plate 05	F12	0	0
orf19.1058		Plate 05	G01	3	3
orf19.927		Plate 05	G02	3	1
orf19.4922		Plate 05	G03	3	3
orf19.4701		Plate 05	G04	3	3
orf19.2564		Plate 05	G05	3	3
orf19.6035		Plate 05	G06	3	0
orf19.4929		Plate 05	G07	0	0
orf19.2961		Plate 05	G08	3	3
orf19.4639		Plate 05	G09	3	3
orf19.713		Plate 05	G10	3	3
orf19.5213		Plate 05	G11	3	3
orf19.5646		Plate 05	G12	3	3
orf19.273		Plate 05	H01	3	3
orf19.4843		Plate 05	H02	3	3
orf19.3012	ARO80	Plate 05	H03	3	3
orf19.7503	CDA2	Plate 05	H04	3	3
orf19.2308		Plate 05	H05	3	3
orf19.6869		Plate 05	H06	3	3
orf19.2660	EAF3	Plate 05	H07	3	3
orf19.577		Plate 05	H08	3	2
orf19.2400		Plate 05	H09	3	3
orf19.4062	TRY2	Plate 05	H10	2	2
orf19.1224	FRP3	Plate 05	H11	3	3
orf19.1844		Plate 05	H12	3	3
orf19.6143		Plate 06	A01	3	3
orf19.2839	CIRT4B	Plate 06	A02	3	3
orf19.1568		Plate 06	A03	3	3
orf19.5953		Plate 06	A04	3	3
orf19.4370		Plate 06	A05	3	3
orf19.121	ARC18	Plate 06	A06	3	NA
orf19.2881	MNN4	Plate 06	A07	3	3
orf19.3226		Plate 06	A08	3	3
orf19.1040	MAD2	Plate 06	A09	3	3
orf19.4758		Plate 06	A10	3	2
orf19.3986	PPR1	Plate 06	A11	NA	NA
orf19.3237		Plate 06	A12	3	3
orf19.5024	GND1	Plate 06	B01	NA	NA
orf19.2727	GRX3	Plate 06	B02	3	3
orf19.5630	APA2	Plate 06	B03	3	3
orf19.144	SNU114	Plate 06	B04	3	1
orf19.3050	AGE1	Plate 06	B05	3	3
orf19.1614	MEP1	Plate 06	B06	3	3
orf19.2551	MET6	Plate 06	B07	3	3
orf19.1986	ARO2	Plate 06	B08	3	1
orf19.3465	RPL10A	Plate 06	B09	2	NA
orf19.1517	ARO3	Plate 06	B10	3	3
orf19.3455		Plate 06	B11	3	3
orf19.568	SPE2	Plate 06	B12	3	3
orf19.445		Plate 06	C01	3	3
orf19.978	BDF1	Plate 06	C02	2	1
orf19.3175		Plate 06	C03	3	3
orf19.804		Plate 06	C04	3	3
orf19.1149	MRF1	Plate 06	C05	3	3
orf19.5220		Plate 06	C06	3	3
orf19.5645	MET15	Plate 06	C07	3	3
orf19.4371	TAL1	Plate 06	C08	3	1
orf19.58	RRP6	Plate 06	C09	3	3
orf19.4754	ZWF1	Plate 06	C10	3	0
orf19.4299	MSW1	Plate 06	C11	3	3
orf19.4306		Plate 06	C12	3	3
orf19.4308	HSL1	Plate 06	D01	3	3
orf19.2580	HST2	Plate 06	D02	2	3
orf19.2738	SUL2	Plate 06	D03	3	3
orf19.578		Plate 06	D04	3	3
orf19.3340	SOD2	Plate 06	D05	2	3
orf19.5053		Plate 06	D06	3	3
orf19.6537		Plate 06	D07	3	3
orf19.5610	ARG3	Plate 06	D08	3	3
orf19.4807		Plate 06	D09	3	3
orf19.4813	GUA1	Plate 06	D10	3	3
orf19.1362	SMM1	Plate 06	D11	3	3
orf19.3715	ASF1	Plate 06	D12	3	3
orf19.6165	KGD1	Plate 06	E01	3	1
orf19.1404		Plate 06	E02	3	3
orf19.6316		Plate 06	E03	3	3
orf19.2333		Plate 06	E04	3	2
orf19.3983		Plate 06	E05	2	3
orf19.2987		Plate 06	E06	3	3
orf19.3131	OYE32	Plate 06	E07	3	3
orf19.4031		Plate 06	E08	3	3
orf19.4035	PGA4	Plate 06	E09	2	1
orf19.4040	ILV3	Plate 06	E10	1	1
orf19.3038	TPS2	Plate 06	E11	3	3
orf19.7016	PHM5	Plate 06	E12	3	3
orf19.2871	SDH12	Plate 06	F01	3	0
orf19.5702		Plate 06	F02	3	3
orf19.1576		Plate 06	F03	3	3
orf19.6324	VID27	Plate 06	F04	3	2
orf19.2337	ALP1	Plate 06	F05	3	3
orf19.5243	TRP3	Plate 06	F06	3	2
orf19.2107	MUQ1	Plate 06	F07	3	3
orf19.5628		Plate 06	F08	3	3
orf19.1720		Plate 06	F09	NA	2
orf19.2844		Plate 06	F10	3	3
orf19.4518		Plate 06	F11	3	3
orf19.3330	CRL1	Plate 06	F12	3	3
orf19.3325		Plate 06	G01	3	3
orf19.3467		Plate 06	G02	3	NA
orf19.4441		Plate 06	G03	3	3
orf19.2133	LIP4	Plate 06	G04	3	3
orf19.3854		Plate 06	G05	3	3
orf19.6730		Plate 06	G06	3	3
orf19.4526	HSP30	Plate 06	G07	3	3
orf19.5994	RHB1	Plate 06	G08	3	2
orf19.5671		Plate 06	G09	3	3
orf19.908	FEN12	Plate 06	G10	3	3
orf19.7463		Plate 06	G11	3	3
orf19.1966	BUD23	Plate 06	G12	3	1
orf19.3407		Plate 06	H01	3	3
orf19.2443	RGD1	Plate 06	H02	3	3
orf19.459	ADP1	Plate 06	H03	3	3
orf19.7330		Plate 06	H04	3	3
orf19.1671	UTR2	Plate 06	H05	3	3
orf19.6578		Plate 06	H06	3	3
orf19.6740		Plate 06	H07	3	1
orf19.308		Plate 06	H08	3	3
orf19.1988	CDC45	Plate 06	H09	3	3
orf19.2965		Plate 06	H10	3	3
orf19.4160		Plate 06	H11	3	3
orf19.4001		Plate 06	H12	3	3
orf19.5038		Plate 07	A01	3	3
orf19.6498		Plate 07	A02	0	NA
orf19.1804		Plate 07	A03	3	3
orf19.3606		Plate 07	A04	3	3
orf19.2341	HNT1	Plate 07	A05	3	3
orf19.7188	RPP1B	Plate 07	A06	3	3
orf19.1683	PPH21	Plate 07	A07	3	3
orf19.5061	ADE5,7	Plate 07	A08	3	3
orf19.955		Plate 07	A09	3	1
orf19.6901		Plate 07	A10	3	3
orf19.6994	BAT22	Plate 07	A11	3	3
orf19.7520	POT1	Plate 07	A12	3	3
orf19.3006		Plate 07	B01	3	3
orf19.2166	VMA5	Plate 07	B02	3	3
orf19.3711		Plate 07	B03	3	3
orf19.968	PGA14	Plate 07	B04	3	3
orf19.118	FAD2	Plate 07	B05	3	3
orf19.4000	GRF10	Plate 07	B06	3	3
orf19.6502		Plate 07	B07	3	3
orf19.3911	SAH1	Plate 07	B08	3	2
orf19.1970		Plate 07	B09	3	3
orf19.5966		Plate 07	B10	3	3
orf19.4416	VPS13	Plate 07	B11	3	3
orf19.7332	ELF1	Plate 07	B12	3	3
orf19.7011		Plate 07	C01	3	1
orf19.4889		Plate 07	C02	1	2
orf19.1977	URA4	Plate 07	C03	3	3
orf19.5234	RBD1	Plate 07	C04	3	3
orf19.4856	LIP3	Plate 07	C05	3	3
orf19.1949	VPS1	Plate 07	C06	3	2
orf19.691	GPD2	Plate 07	C07	3	3
orf19.1747	KIP2	Plate 07	C08	3	3
orf19.3526	ITR1	Plate 07	C09	3	3
orf19.4736		Plate 07	C10	3	3
orf19.7396		Plate 07	C11	3	3
orf19.873		Plate 07	C12	3	3
orf19.4461		Plate 07	D01	3	3
orf19.314		Plate 07	D02	3	3
orf19.6569		Plate 07	D03	3	3
orf19.5337	UBC15	Plate 07	D04	3	3
orf19.5079	CDR4	Plate 07	D05	3	3
orf19.6060	GCN20	Plate 07	D06	3	3
orf19.635		Plate 07	D07	3	3
orf19.1606		Plate 07	D08	3	3
orf19.5727		Plate 07	D09	3	3
orf19.2172	ARA1	Plate 07	D10	3	3
orf19.4534		Plate 07	D11	3	3
orf19.3613		Plate 07	D12	3	2
orf19.3064	MRPL27	Plate 07	E01	3	1
orf19.1204		Plate 07	E02	3	3
orf19.4599	PHO89	Plate 07	E03	3	3
orf19.3981	MAL31	Plate 07	E04	3	3
orf19.7074		Plate 07	E05	3	3
orf19.7083	DCC1	Plate 07	E06	3	3
orf19.3292		Plate 07	E07	3	3
orf19.734	GLK1	Plate 07	E08	3	3
orf19.4953		Plate 07	E09	3	3
orf19.3736	KAR4	Plate 07	E10	3	3
orf19.7404		Plate 07	E11	3	3
orf19.548	CDC10	Plate 07	E12	2	3
orf19.807	CHS5	Plate 07	F01	3	3
orf19.7522		Plate 07	F02	3	3
orf19.2194		Plate 07	F03	3	3
orf19.2193	PRS5	Plate 07	F04	3	3
orf19.3507	MCR1	Plate 07	F05	3	3
orf19.1795	PUF3	Plate 07	F06	3	3
orf19.5640	PEX5	Plate 07	F07	3	3
orf19.6176	SEC61	Plate 07	F08	3	NA
orf19.3681		Plate 07	F09	3	0
orf19.150	TIM17	Plate 07	F10	3	2
orf19.2967	TIF34	Plate 07	F11	1	NA
orf19.1578		Plate 07	F12	3	2
orf19.2694	TYS1	Plate 07	G01	3	1
orf19.1261	CGT1	Plate 07	G02	3	3
orf19.4367	SMC1	Plate 07	G03	3	2
orf19.4577.3	TIM10	Plate 07	G04	2	0
orf19.5623	ARP4	Plate 07	G05	3	2
orf19.1335		Plate 07	G06	3	3
orf19.7307		Plate 07	G07	3	2
orf19.6355		Plate 07	G08	3	1
orf19.7335	PRE8	Plate 07	G09	3	1
orf19.4799		Plate 07	G10	3	0
orf19.6908		Plate 07	G11	3	3
orf19.7222	PAM16	Plate 07	G12	2	1
orf19.262	SMC3	Plate 07	H01	2	3
orf19.3259		Plate 07	H02	3	3
orf19.5184		Plate 07	H03	3	1
orf19.4993	SEC18	Plate 07	H04	3	0
orf19.4004	CCT3	Plate 07	H05	3	NA
orf19.6649	BRF1	Plate 07	H06	3	1
orf19.7552		Plate 07	H07	3	1
orf19.718	RRN11	Plate 07	H08	3	3
orf19.3541	ERF1	Plate 07	H09	3	1
orf19.3873	ARC40	Plate 07	H10	3	0
orf19.213		Plate 07	H11	3	3
orf19.1283	MEC1	Plate 07	H12	3	3
orf19.5959	NOP14	Plate 08	A01	3	1
orf19.6652	DBP8	Plate 08	A02	3	1
orf19.1248		Plate 08	A03	3	2
orf19.5260	RPN2	Plate 08	A04	3	2
orf19.5685	THS1	Plate 08	A05	3	NA
orf19.3052	YPT1	Plate 08	A06	3	2
orf19.487	SPT14	Plate 08	A07	3	3
orf19.6584	PRT1	Plate 08	A08	3	3
orf19.538		Plate 08	A09	3	1
orf19.747	NBP35	Plate 08	A10	3	3
orf19.544.1	PRE6	Plate 08	A11	3	3
orf19.485		Plate 08	A12	3	NA
orf19.4775	CTA8	Plate 08	B01	3	3
orf19.3540	MAK5	Plate 08	B02	3	3
orf19.1674	CDC53	Plate 08	B03	3	3
orf19.1701	RKI1	Plate 08	B04	3	3
orf19.7261		Plate 08	B05	3	2
orf19.2105		Plate 08	B06	3	3
orf19.1282	CKS1	Plate 08	B07	3	3
orf19.2677		Plate 08	B08	3	0
orf19.4032	RPN5	Plate 08	B09	3	3
orf19.536		Plate 08	B10	3	1
orf19.2611	MCM6	Plate 08	B11	3	3
orf19.7057	GUS1	Plate 08	B12	3	0
orf19.7441		Plate 08	C01	3	3
orf19.5436	UTP8	Plate 08	C02	3	3
orf19.1460		Plate 08	C03	3	1
orf19.239		Plate 08	C04	3	3
orf19.886	PAN1	Plate 08	C05	3	2
orf19.4479		Plate 08	C06	3	0
orf19.5801	RNR21	Plate 08	C07	3	3
orf19.7511		Plate 08	C08	2	3
orf19.3234.1	SFT1	Plate 08	C09	3	1
orf19.6163	CSE4	Plate 08	C10	3	3
orf19.903	GPM1	Plate 08	C11	3	2
orf19.6284		Plate 08	C12	3	2
orf19.5244	MCD4	Plate 08	D01	3	2
orf19.325		Plate 08	D02	3	2
orf19.4281	IFH1	Plate 08	D03	3	3
orf19.5391		Plate 08	D04	3	3
orf19.3000	ORC1	Plate 08	D05	3	3
orf19.6010	CDC5	Plate 08	D06	3	3
orf19.2675		Plate 08	D07	3	2
orf19.3059	SUA71	Plate 08	D08	3	3
orf19.2672	NCP1	Plate 08	D09	3	1
orf19.603	IMP4	Plate 08	D10	3	1
orf19.3474	IPL1	Plate 08	D11	3	3
orf19.5358		Plate 08	D12	3	3
orf19.7178	PRE5	Plate 08	E01	3	3
orf19.4093	PES1	Plate 08	E02	2	0
orf19.5413		Plate 08	E03	3	1
orf19.2437	ARC35	Plate 08	E04	3	NA
orf19.1085		Plate 08	E05	3	3
orf19.6783		Plate 08	E06	3	3
orf19.1560	POB3	Plate 08	E07	3	3
orf19.7581		Plate 08	E08	3	3
orf19.3206	CCT7	Plate 08	E09	3	NA
orf19.757		Plate 08	E10	3	3
orf19.2468		Plate 08	E11	3	3
orf19.2751		Plate 08	E12	3	3
orf19.1089	PEX11	Plate 08	F01	3	3
orf19.3142		Plate 08	F02	3	3
orf19.1010	MNT3	Plate 08	F03	3	3
orf19.2781		Plate 08	F04	3	3
orf19.4459		Plate 08	F05	3	3
orf19.2665	MSN5	Plate 08	F06	3	3
orf19.59	REI1	Plate 08	F07	3	3
orf19.1114		Plate 08	F08	3	3
orf19.6736		Plate 08	F09	3	3
orf19.2304		Plate 08	F10	3	3
orf19.1537		Plate 08	F11	3	3
orf19.1339	CPY1	Plate 08	F12	3	3
orf19.4466		Plate 08	G01	3	3
orf19.6738	VAN1	Plate 08	G02	1	1
orf19.2474	PRC3	Plate 08	G03	3	3
orf19.2538	PTC2	Plate 08	G04	3	3
orf19.2709	ZUO1	Plate 08	G05	3	1
orf19.6538	VMA11	Plate 08	G06	3	2
orf19.1084	CDC39	Plate 08	G07	3	2
orf19.1161	PLD1	Plate 08	G08	3	3
orf19.799	STE4	Plate 08	G09	3	3
orf19.1734		Plate 08	G10	3	3
orf19.671	PSP1	Plate 08	G11	3	3
orf19.4778	LYS142	Plate 08	G12	3	3
orf19.4563		Plate 08	H01	3	3
orf19.2094	PDR6	Plate 08	H02	3	3
orf19.7460		Plate 08	H03	3	3
orf19.2887		Plate 08	H04	3	3
orf19.758		Plate 08	H05	3	3
orf19.4279	MNN1	Plate 08	H06	3	3
orf19.6082		Plate 08	H07	3	3
orf19.7096		Plate 08	H08	3	3
orf19.425		Plate 08	H09	3	3
orf19.1016		Plate 08	H10	3	3
orf19.3476		Plate 08	H11	3	2
orf19.2040		Plate 08	H12	3	3
orf19.1687		Plate 09	A01	3	3
orf19.1254	SEC23	Plate 09	A02	3	3
orf19.2230		Plate 09	A03	3	3
orf19.4293		Plate 09	A04	3	3
orf19.3251	ARC19	Plate 09	A05	3	0
orf19.1883	YCS4	Plate 09	A06	3	3
orf19.1457		Plate 09	A07	2	3
orf19.6340		Plate 09	A08	3	3
orf19.5513		Plate 09	A09	3	3
orf19.3524	CRK1	Plate 09	A10	3	3
orf19.5174	TAF19	Plate 09	A11	3	3
orf19.1444		Plate 09	A12	3	1
orf19.3545		Plate 09	B01	2	3
orf19.4961	STP2	Plate 09	B02	3	3
orf19.4967	COX19	Plate 09	B03	3	2
orf19.5214	VPS33	Plate 09	B04	3	3
orf19.2106		Plate 09	B05	3	3
orf19.3799		Plate 09	B06	3	3
orf19.3176	RIM21	Plate 09	B07	3	3
orf19.307		Plate 09	B08	3	3
orf19.351		Plate 09	B09	3	3
orf19.2782		Plate 09	B10	3	3
orf19.3557	GPI19	Plate 09	B11	3	3
orf19.3785		Plate 09	B12	3	3
orf19.2266		Plate 09	C01	3	3
orf19.1634		Plate 09	C02	3	3
orf19.4195		Plate 09	C03	3	3
orf19.3697		Plate 09	C04	3	3
orf19.7568		Plate 09	C05	3	3
orf19.719		Plate 09	C06	3	3
orf19.7386		Plate 09	C07	2	2
orf19.720	GST3	Plate 09	C08	3	3
orf19.7598		Plate 09	C09	3	3
orf19.3589	SPO11	Plate 09	C10	3	3
orf19.2439		Plate 09	C11	3	3
orf19.4766	ARG81	Plate 09	C12	3	3
orf19.6756		Plate 09	D01	3	3
orf19.5078		Plate 09	D02	3	3
orf19.6508		Plate 09	D03	3	3
orf19.5772		Plate 09	D04	3	3
orf19.4725	SWI6	Plate 09	D05	3	3
orf19.4242	CST20	Plate 09	D06	3	3
orf19.1490	MSB2	Plate 09	D07	3	3
orf19.6801	RPD31	Plate 09	D08	3	3
orf19.1792		Plate 09	D09	3	3
orf19.171	DBP2	Plate 09	D10	3	2
orf19.5447	HGT19	Plate 09	D11	3	3
orf19.3642	SUN41	Plate 09	D12	3	3
orf19.814	SSY1	Plate 09	E01	3	3
orf19.7433		Plate 09	E02	3	3
orf19.5664	HOF1	Plate 09	E03	3	3
orf19.4013		Plate 09	E04	3	3
orf19.5680		Plate 09	E05	3	3
orf19.5885		Plate 09	E06	3	2
orf19.4373		Plate 09	E07	3	3
orf19.5085		Plate 09	E08	3	3
orf19.2736	HFL2	Plate 09	E09	3	3
orf19.4374	PRP42	Plate 09	E10	3	3
orf19.5378	SCL1	Plate 09	E11	3	3
orf19.2275		Plate 09	E12	3	1
orf19.5963		Plate 09	F01	2	3
orf19.3856	CDC28	Plate 09	F02	3	3
orf19.5383	PMA1	Plate 09	F03	3	0
orf19.2571	SEC4	Plate 09	F04	3	0
orf19.4620	TIM12	Plate 09	F05	2	1
orf19.202	CDC47	Plate 09	F06	3	3
orf19.3211	RCF3	Plate 09	F07	3	3
orf19.5833		Plate 09	F08	3	3
orf19.2885	PRI2	Plate 09	F09	3	3
orf19.4732	SEC24	Plate 09	F10	3	0
orf19.1771		Plate 09	F11	3	3
orf19.488	MEX67	Plate 09	F12	3	3
orf19.7293	MPS1	Plate 09	G01	3	2
orf19.3888	PGI1	Plate 09	G02	3	2
orf19.6135.1	SMX4	Plate 09	G03	3	2
orf19.3300	ZPR1	Plate 09	G04	3	1
orf19.6776	GCD2	Plate 09	G05	2	2
orf19.900	NSP1	Plate 09	G06	3	1
orf19.969		Plate 09	G07	3	3
orf19.964	SMC4	Plate 09	G08	3	3
orf19.796	HYM1	Plate 09	G09	1	3
orf19.6909		Plate 09	G10	3	1
orf19.3962	HAS1	Plate 09	G11	3	1
orf19.337		Plate 09	G12	3	2
orf19.2307		Plate 09	H01	3	3
orf19.1402	CCT2	Plate 09	H02	3	1
orf19.6861		Plate 09	H03	3	3
orf19.6598	WAL1	Plate 09	H04	3	3
orf19.5846		Plate 09	H05	3	3
orf19.4033	PRP22	Plate 09	H06	3	3
orf19.3478	NIP7	Plate 09	H07	3	2
orf19.5732	NOG2	Plate 09	H08	3	2
orf19.6539		Plate 09	H09	3	2
orf19.3031	SEC62	Plate 09	H10	3	3
orf19.2528		Plate 09	H11	3	3
orf19.3623	SMC2	Plate 09	H12	3	3
orf19.4542		Plate 10	A01	3	3
orf19.2643	RPO26	Plate 10	A02	3	3
orf19.7256		Plate 10	A03	3	3
orf19.6931		Plate 10	A04	3	3
orf19.6234		Plate 10	A05	3	3
orf19.2843	RHO1	Plate 10	A06	3	0
orf19.4120	LAS1	Plate 10	A07	3	3
orf19.922	ERG11	Plate 10	A08	3	0
orf19.2609	CET1	Plate 10	A09	3	3
orf19.2560	CDC60	Plate 10	A10	3	1
orf19.5692		Plate 10	A11	3	3
orf19.708		Plate 10	A12	3	3
orf19.7141	UFE1	Plate 10	B01	3	3
orf19.5166	DBF4	Plate 10	B02	3	3
orf19.7492	SWC4	Plate 10	B03	3	2
orf19.5884		Plate 10	B04	3	2
orf19.1434		Plate 10	B05	3	3
orf19.4443	YPD1	Plate 10	B06	3	3
orf19.2831	RPC31	Plate 10	B07	3	1
orf19.7620		Plate 10	B08	3	3
orf19.1569	UTP22	Plate 10	B09	3	3
orf19.3724		Plate 10	B10	3	2
orf19.801	TBF1	Plate 10	B11	3	1
orf19.677	CHO1	Plate 10	B12	3	3
orf19.6489	FMP45	Plate 10	C01	NA	NA
orf19.1945	AUR1	Plate 10	C02	1	0
orf19.29		Plate 10	C03	3	3
orf19.4566		Plate 10	C04	3	3
orf19.5363	alg14	Plate 10	C05	3	3
orf19.4161		Plate 10	C06	3	3
orf19.2187	ALG7	Plate 10	C07	3	1
orf19.7308	TUB1	Plate 10	C08	3	3
orf19.7599	UTP5	Plate 10	C09	3	2
orf19.4849		Plate 10	C10	3	3
orf19.6341		Plate 10	C11	3	3
orf19.4601		Plate 10	C12	3	3
orf19.1776		Plate 10	D01	3	3
orf19.6346		Plate 10	D02	3	3
orf19.579	FOL1	Plate 10	D03	NA	NA
orf19.7019	YML6	Plate 10	D04	3	1
orf19.6880		Plate 10	D05	NA	NA
orf19.5526	SEC20	Plate 10	D06	3	3
orf19.379		Plate 10	D07	3	3
orf19.2717	SAS10	Plate 10	D08	3	2
orf19.6821		Plate 10	D09	3	3
orf19.7361		Plate 10	D10	3	3
orf19.1136		Plate 10	D11	3	3
orf19.5242	CDC6	Plate 10	D12	3	1
orf19.3960	HYS2	Plate 10	E01	3	3
orf19.5196	ESS1	Plate 10	E02	3	3
orf19.4030		Plate 10	E03	1	3
orf19.6881	YTH1	Plate 10	E04	3	2
orf19.5027	LCB2	Plate 10	E05	3	0
orf19.2775	IDI1	Plate 10	E06	3	3
orf19.3027		Plate 10	E07	3	3
orf19.1137		Plate 10	E08	3	3
orf19.2288	CCT5	Plate 10	E09	3	3
orf19.2289	ARP3	Plate 10	E10	3	0
orf19.4817	RAM2	Plate 10	E11	3	3
orf19.4223	GCD11	Plate 10	E12	2	0
orf19.6702	DED81	Plate 10	F01	3	2
orf19.6701		Plate 10	F02	3	3
orf19.1029		Plate 10	F03	3	3
orf19.1626		Plate 10	F04	3	3
orf19.1570	ERG7	Plate 10	F05	3	1
orf19.596.1	NOP10	Plate 10	F06	3	1
orf19.6455		Plate 10	F07	3	3
orf19.7488		Plate 10	F08	3	2
orf19.4625	TOA2	Plate 10	F09	3	3
orf19.1618	GFA1	Plate 10	F10	3	3
orf19.443		Plate 10	F11	3	2
orf19.441	RPT1	Plate 10	F12	3	1
orf19.4492		Plate 10	G01	3	3
orf19.2974	YKT6	Plate 10	G02	3	2
orf19.7438	UBA1	Plate 10	G03	3	2
orf19.5425		Plate 10	G04	3	1
orf19.2818		Plate 10	G05	2	3
orf19.3867	RPL7	Plate 10	G06	3	3
orf19.3862		Plate 10	G07	3	2
orf19.3861	SIS1	Plate 10	G08	3	3
orf19.501		Plate 10	G09	2	1
orf19.5873	POL1	Plate 10	G10	3	3
orf19.172	RPC19	Plate 10	G11	3	3
orf19.6312	RPS3	Plate 10	G12	1	1
orf19.5682		Plate 10	H01	3	3
orf19.1280	SUI1	Plate 10	H02	3	1
orf19.5835		Plate 10	H03	3	1
orf19.3898		Plate 10	H04	3	3
orf19.512		Plate 10	H05	3	0
orf19.7154	UTP18	Plate 10	H06	3	2
orf19.7358	SAM50	Plate 10	H07	3	3
orf19.1026		Plate 10	H08	3	3
orf19.7631	SLD5	Plate 10	H09	3	3
orf19.5444	TIM44	Plate 10	H10	3	0
orf19.2179	SIT1	Plate 10	H11	3	3
orf19.1878	MED4	Plate 10	H12	3	3
orf19.1574		Plate 11	A01	3	2
orf19.5198	NOP4	Plate 11	A02	3	1
orf19.5168		Plate 11	A03	3	1
orf19.5722		Plate 11	A04	3	3
orf19.7285		Plate 11	A05	3	3
orf19.5008.1	DAD1	Plate 11	A06	3	NA
orf19.4133		Plate 11	A07	3	3
orf19.3970		Plate 11	A08	3	1
orf19.2325		Plate 11	A09	3	3
orf19.3333		Plate 11	A10	3	3
orf19.5850	NOC2	Plate 11	A11	3	0
orf19.88	ILV5	Plate 11	A12	3	3
orf19.2389		Plate 11	B01	3	3
orf19.6373	DCP2	Plate 11	B02	3	0
orf19.6648	SDA1	Plate 11	B03	3	0
orf19.3553	RPF2	Plate 11	B04	3	2
orf19.7197		Plate 11	B05	3	2
orf19.4203		Plate 11	B06	3	3
orf19.410.3		Plate 11	B07	3	2
orf19.3334	RPS21	Plate 11	B08	1	NA
orf19.1901	MCM3	Plate 11	B09	2	2
orf19.567	TFB3	Plate 11	B10	3	2
orf19.7286	RPN7	Plate 11	B11	3	NA
orf19.3564	RPC40	Plate 11	B12	3	3
orf19.3647	SEC8	Plate 11	C01	3	1
orf19.670	SMT3	Plate 11	C02	3	3
orf19.2425.2	RPL28	Plate 11	C03	3	NA
orf19.336	YAH1	Plate 11	C04	3	1
orf19.6437	CDC23	Plate 11	C05	3	3
orf19.5073	DPM1	Plate 11	C06	3	3
orf19.7563	BET2	Plate 11	C07	3	0
orf19.4125		Plate 11	C08	3	3
orf19.407	GCD6	Plate 11	C09	3	0
orf19.7449		Plate 11	C10	3	3
orf19.7569	SIK1	Plate 11	C11	3	NA
orf19.4268	UTP13	Plate 11	C12	3	NA
orf19.7673		Plate 11	D01	3	NA
orf19.3013	CDC12	Plate 11	D02	3	3
orf19.3990		Plate 11	D03	3	2
orf19.1896	SSC1	Plate 11	D04	3	0
orf19.4363	SGD1	Plate 11	D05	3	2
orf19.6369	RIO2	Plate 11	D06	3	3
orf19.640		Plate 11	D07	3	1
orf19.4659		Plate 11	D08	3	1
orf19.4499	RIM2	Plate 11	D09	3	0
orf19.1352	TIM22	Plate 11	D10	3	0
orf19.2362		Plate 11	D11	3	0
orf19.2825		Plate 11	D12	3	3
orf19.5066		Plate 11	E01	3	3
orf19.6903		Plate 11	E02	3	1
orf19.2519		Plate 11	E03	3	NA
orf19.7072	PEL1	Plate 11	E04	NA	NA
orf19.3551	DAD2	Plate 11	E05	3	NA
orf19.4931		Plate 11	E06	3	1
orf19.7343		Plate 11	E07	3	2
orf19.2287	RPA12	Plate 11	E08	3	NA
orf19.7548	MED21	Plate 11	E09	3	3
orf19.3250		Plate 11	E10	3	3
orf19.2557	SEC65	Plate 11	E11	3	3
orf19.6463		Plate 11	E12	3	2
orf19.6479	SEC1	Plate 11	F01	3	3
orf19.5887	NUP85	Plate 11	F02	2	NA
orf19.7312	ERG13	Plate 11	F03	3	0
orf19.1886	RCL1	Plate 11	F04	3	NA
orf19.7658	RFC4	Plate 11	F05	3	3
orf19.7626	EIF4E	Plate 11	F06	2	2
orf19.4681	RAT1	Plate 11	F07	3	3
orf19.6955	HBR3	Plate 11	F08	3	NA
orf19.1601	RPL3	Plate 11	F09	0	3
orf19.3817		Plate 11	F10	3	3
orf19.1761	OST2	Plate 11	F11	3	0
orf19.3103		Plate 11	F12	2	NA
orf19.3123	RPT5	Plate 11	G01	2	0
orf19.3349		Plate 11	G02	3	NA
orf19.7605	PUP1	Plate 11	G03	3	NA
orf19.4205.1		Plate 11	G04	3	NA
orf19.2682		Plate 11	G05	3	3
orf19.5847		Plate 11	G06	3	NA
orf19.2687.1		Plate 11	G07	3	NA
orf19.6891	RFC1	Plate 11	G08	3	3
orf19.6314	RPB8	Plate 11	G09	3	1
orf19.2524	MGE1	Plate 11	G10	3	2
orf19.482	RPT4	Plate 11	G11	3	NA
orf19.5351	TIF11	Plate 11	G12	3	0
orf19.7050	NOP15	Plate 11	H01	3	NA
orf19.3060		Plate 11	H02	3	NA
orf19.6742		Plate 11	H03	3	3
orf19.6233		Plate 11	H04	3	1
orf19.2367		Plate 11	H05	3	3
orf19.6884	GWT1	Plate 11	H06	3	3
orf19.6917		Plate 11	H07	3	3
orf19.4168		Plate 11	H08	3	3
orf19.5268	MED10	Plate 11	H09	3	3
orf19.6512	EXO70	Plate 11	H10	3	3
orf19.700	SEO1	Plate 11	H11	3	3
orf19.688		Plate 11	H12	3	0
orf19.2735	SEN2	Plate 12	A01	1	NA
orf19.5346		Plate 12	A02	3	1
orf19.5551	MIF2	Plate 12	A03	3	NA
orf19.6923		Plate 12	A04	3	3
orf19.832	GPI13	Plate 12	A05	3	3
orf19.124	CIC1	Plate 12	A06	3	3
orf19.4626		Plate 12	A07	3	3
orf19.1386		Plate 12	A08	3	2
orf19.5039		Plate 12	A09	3	2
orf19.7624		Plate 12	A10	3	3
orf19.1941	NUF2	Plate 12	A11	3	3
orf19.7634	MCD1	Plate 12	A12	3	1
orf19.1361	TIM23	Plate 12	B01	3	NA
orf19.491		Plate 12	B02	3	NA
orf19.793	CAK1	Plate 12	B03	2	3
orf19.4353	ULP2	Plate 12	B04	3	3
orf19.2267	RFA2	Plate 12	B05	3	1
orf19.6052	CNS1	Plate 12	B06	3	0
orf19.3831		Plate 12	B07	2	2
orf19.474		Plate 12	B08	3	3
orf19.423		Plate 12	B09	3	2
orf19.2715	RPC53	Plate 12	B10	3	1
orf19.4190	PAM18	Plate 12	B11	3	0
orf19.3304		Plate 12	B12	3	1
orf19.910		Plate 12	C01	3	2
orf19.7615		Plate 12	C02	3	NA
orf19.1622	YCG1	Plate 12	C03	3	2
orf19.544		Plate 12	C04	3	3
orf19.3531		Plate 12	C05	3	3
orf19.232		Plate 12	C06	3	3
orf19.6544	LPI9	Plate 12	C07	3	3
orf19.24	RTA2	Plate 12	C08	3	3
orf19.1152		Plate 12	C09	2	3
orf19.2246		Plate 12	C10	2	3
orf19.6477		Plate 12	C11	1	1
orf19.4026	HIS1	Plate 12	C12	3	3
orf19.4884	WOR1	Plate 12	D01	3	3
orf19.3810		Plate 12	D02	3	3
orf19.7412	MUB1	Plate 12	D03	3	2
orf19.2581		Plate 12	D04	3	3
orf19.5665		Plate 12	D05	3	3
orf19.1366		Plate 12	D06	3	3
orf19.3763		Plate 12	D07	3	3
orf19.6995	ATO6	Plate 12	D08	3	3
orf19.2137		Plate 12	D09	3	3
orf19.942	KRE62	Plate 12	D10	3	3
orf19.4846		Plate 12	D11	3	3
orf19.3938		Plate 12	D12	3	0
orf19.2065		Plate 12	E01	3	3
orf19.1805	PEX14	Plate 12	E02	3	3
orf19.4524	ZCF24	Plate 12	E03	3	3
orf19.2666	MSN5	Plate 12	E04	3	2
orf19.1793		Plate 12	E05	3	3
orf19.1375	LEU42	Plate 12	E06	3	3
orf19.4898		Plate 12	E07	3	3
orf19.2115		Plate 12	E08	3	3
orf19.2810	AAP1	Plate 12	E09	3	3
orf19.2214		Plate 12	E10	2	0
orf19.6068	SVF1	Plate 12	E11	3	3
orf19.1523	FMO1	Plate 12	E12	2	3
orf19.4614		Plate 12	F01	3	3
orf19.2241	PST1	Plate 12	F02	3	3
orf19.153	TPO5	Plate 12	F03	3	3
orf19.1442	PLB4.5	Plate 12	F04	3	3
orf19.3247		Plate 12	F05	3	2
orf19.318		Plate 12	F06	3	2
orf19.3051		Plate 12	F07	3	3
orf19.2458		Plate 12	F08	3	3
orf19.3023	NGG1	Plate 12	F09	3	2
orf19.4003	TIP20	Plate 12	F10	2	0
orf19.3923	PGA37	Plate 12	F11	2	3
orf19.5498	EFH1	Plate 12	F12	2	3
orf19.1991		Plate 12	G01	3	3
orf19.805		Plate 12	G02	3	3
orf19.4520		Plate 12	G03	3	3
orf19.4850		Plate 12	G04	3	3
orf19.2217		Plate 12	G05	3	3
orf19.6348		Plate 12	G06	2	2
orf19.3302		Plate 12	G07	3	3
orf19.511		Plate 12	G08	3	3
orf19.7033		Plate 12	G09	3	3
orf19.3669	SHA3	Plate 12	G10	3	3
orf19.6744		Plate 12	G11	3	3
orf19.6705		Plate 12	G12	3	2
orf19.4923		Plate 12	H01	3	3
orf19.1585	ZRT2	Plate 12	H02	3	3
orf19.2209	YVC1	Plate 12	H03	3	3
orf19.473	TPO4	Plate 12	H04	3	3
orf19.3003		Plate 12	H05	3	3
orf19.3950	MSM1	Plate 12	H06	3	2
orf19.2445		Plate 12	H07	3	3
orf19.2350		Plate 12	H08	3	3
orf19.5815	SCT2	Plate 12	H09	3	3
orf19.3083		Plate 12	H10	3	3
orf19.4612		Plate 12	H11	3	3
orf19.6081	PHR2	Plate 12	H12	3	3
orf19.2003	HNM1	Plate 13	A01	3	3
orf19.339	NDE1	Plate 13	A02	3	3
orf19.986	GLY1	Plate 13	A03	3	3
orf19.3895	CHT2	Plate 13	A04	3	3
orf19.2908		Plate 13	A05	3	3
orf19.5676		Plate 13	A06	3	3
orf19.7128	SYS1	Plate 13	A07	3	3
orf19.2175		Plate 13	A08	3	3
orf19.3991		Plate 13	A09	3	3
orf19.3099	TRP4	Plate 13	A10	3	2
orf19.7310		Plate 13	A11	3	3
orf19.5796	SHE9	Plate 13	A12	3	3
orf19.2575		Plate 13	B01	3	3
orf19.7661	HMI1	Plate 13	B02	3	3
orf19.3441	FRP6	Plate 13	B03	3	3
orf19.989		Plate 13	B04	3	3
orf19.673		Plate 13	B05	3	3
orf19.3111	PRA1	Plate 13	B06	3	3
orf19.6809		Plate 13	B07	3	3
orf19.5757		Plate 13	B08	3	3
orf19.4678		Plate 13	B09	3	3
orf19.5459		Plate 13	B10	3	3
orf19.5755		Plate 13	B11	3	2
orf19.2446		Plate 13	B12	3	3
orf19.1220	RVS167	Plate 13	C01	3	0
orf19.689	PLB1	Plate 13	C02	3	3
orf19.341		Plate 13	C03	3	3
orf19.6993	GAP2	Plate 13	C04	3	3
orf19.1388		Plate 13	C05	3	3
orf19.166	ASG1	Plate 13	C06	3	3
orf19.681	HAP43	Plate 13	C07	3	3
orf19.3355	ISN1	Plate 13	C08	3	3
orf19.2284		Plate 13	C09	3	3
orf19.3348		Plate 13	C10	3	1
orf19.2574		Plate 13	C11	3	3
orf19.4699		Plate 13	C12	3	3
orf19.2016		Plate 13	D01	3	3
orf19.3607		Plate 13	D02	1	1
orf19.3795	AGP3	Plate 13	D03	3	3
orf19.5535		Plate 13	D04	3	3
orf19.6719		Plate 13	D05	3	3
orf19.541		Plate 13	D06	3	3
orf19.7403		Plate 13	D07	3	3
orf19.5026		Plate 13	D08	3	3
orf19.5292	AXL2	Plate 13	D09	3	3
orf19.7518	ZCF38	Plate 13	D10	3	3
orf19.7364		Plate 13	D11	3	3
orf19.5839	PDR17	Plate 13	D12	3	3
orf19.7370		Plate 13	E01	3	3
orf19.4471		Plate 13	E02	3	3
orf19.5970		Plate 13	E03	3	3
orf19.1445	ESC4	Plate 13	E04	3	3
orf19.7377	ASE1	Plate 13	E05	3	3
orf19.2045		Plate 13	E06	3	3
orf19.6444		Plate 13	E07	3	3
orf19.5837		Plate 13	E08	3	3
orf19.6882	OSM1	Plate 13	E09	3	3
orf19.6899		Plate 13	E10	3	3
orf19.644	HGT9	Plate 13	E11	3	3
orf19.3759		Plate 13	E12	3	3
orf19.2875		Plate 13	F01	3	3
orf19.3150	GRE2	Plate 13	F02	3	3
orf19.2983	CDC73	Plate 13	F03	3	2
orf19.4396		Plate 13	F04	3	3
orf19.7495		Plate 13	F05	3	3
orf19.7437		Plate 13	F06	3	3
orf19.4617		Plate 13	F07	3	3
orf19.778	PIL1	Plate 13	F08	3	3
orf19.2055	NPL6	Plate 13	F09	3	3
orf19.5426		Plate 13	F10	3	3
orf19.3066	ENG1	Plate 13	F11	3	3
orf19.367	CNH1	Plate 13	F12	3	3
orf19.4833	MLS1	Plate 13	G01	3	3
orf19.2072		Plate 13	G02	3	3
orf19.1980	GIT4	Plate 13	G03	3	3
orf19.1979	GIT3	Plate 13	G04	3	3
orf19.4781	GRP1	Plate 13	G05	3	3
orf19.988		Plate 13	G06	3	3
orf19.3149	LSP1	Plate 13	G07	3	3
orf19.2019		Plate 13	G08	3	1
orf19.3352		Plate 13	G09	3	3
orf19.2113		Plate 13	G10	3	3
orf19.5205		Plate 13	G11	3	3
orf19.4584	PHO114	Plate 13	G12	3	3
orf19.3926	RNY11	Plate 13	H01	3	3
orf19.5663	RCH1	Plate 13	H02	3	3
orf19.3764	GSG1	Plate 13	H03	3	3
orf19.3592	JEM1	Plate 13	H04	3	3
orf19.6091	RIM8	Plate 13	H05	3	3
orf19.4213	FET31	Plate 13	H06	3	3
orf19.4805		Plate 13	H07	3	3
orf19.1249		Plate 13	H08	3	3
orf19.4874	MNN23	Plate 13	H09	3	3
orf19.2930		Plate 13	H10	3	3
orf19.1665	MNT1	Plate 13	H11	3	3
orf19.2352		Plate 13	H12	3	3
orf19.5777		Plate 14	A01	3	3
orf19.3922		Plate 14	A02	3	3
orf19.3399		Plate 14	A03	3	3
orf19.1185		Plate 14	A04	2	2
orf19.2848		Plate 14	A05	3	3
orf19.3212	MID1	Plate 14	A06	3	3
orf19.7176	NPT1	Plate 14	A07	3	3
orf19.7243		Plate 14	A08	3	3
orf19.151	TPO5	Plate 14	A09	3	3
orf19.4573	ZCF26	Plate 14	A10	3	3
orf19.3365	DAO2	Plate 14	A11	3	3
orf19.3449		Plate 14	A12	3	3
orf19.2396	IFR2	Plate 14	B01	3	3
orf19.2394		Plate 14	B02	3	3
orf19.4788	ARG5,6	Plate 14	B03	3	3
orf19.1800		Plate 14	B04	3	3
orf19.2573	FRS1	Plate 14	B05	3	0
orf19.329		Plate 14	B06	3	0
orf19.332		Plate 14	B07	3	3
orf19.5106	DIP2	Plate 14	B08	3	0
orf19.4146	SMD3	Plate 14	B09	3	0
orf19.1064	ACS2	Plate 14	B10	3	1
orf19.3026	MAS1	Plate 14	B11	3	0
orf19.1833		Plate 14	B12	3	0
orf19.316	SEC13	Plate 14	C01	3	3
orf19.717	HSP60	Plate 14	C02	3	0
orf19.3393		Plate 14	C03	3	3
orf19.5486		Plate 14	C04	3	0
orf19.825	GCD7	Plate 14	C05	2	0
orf19.5493	GSP1	Plate 14	C06	2	0
orf19.2863.1	ERV1	Plate 14	C07	3	3
orf19.7483	CRM1	Plate 14	C08	3	2
orf19.7454	TAF60	Plate 14	C09	3	2
orf19.4538		Plate 14	C10	3	2
orf19.4631	ERG251	Plate 14	C11	3	3
orf19.2917		Plate 14	C12	3	2
orf19.837	GNA1	Plate 14	D01	3	3
orf19.1390	PMI1	Plate 14	D02	3	3
orf19.2183	KRE30	Plate 14	D03	3	0
orf19.6375	RPS20	Plate 14	D04	1	0
orf19.1478	STT3	Plate 14	D05	3	0
orf19.4262		Plate 14	D06	3	3
orf19.6459	DPP3	Plate 14	D07	3	3
orf19.2182	BLM3	Plate 14	D08	3	3
orf19.2302		Plate 14	D09	3	3
orf19.2695	UBR1	Plate 14	D10	3	3
orf19.2991	HOL1	Plate 14	D11	3	3
orf19.3546	PEX2	Plate 14	D12	3	3
orf19.4655	OPT6	Plate 14	E01	3	3
orf19.6551		Plate 14	E02	3	1
orf19.2242	PRB1	Plate 14	E03	3	3
orf19.4608	PDC12	Plate 14	E04	3	3
orf19.3124		Plate 14	E05	3	3
orf19.1291	ABZ1	Plate 14	E06	2	3
orf19.2292	OPT4	Plate 14	E07	3	3
orf19.333	FCY2	Plate 14	E08	3	3
orf19.5932		Plate 14	E09	3	3
orf19.5023	DAL7	Plate 14	E10	3	3
orf19.4985	GUP1	Plate 14	E11	3	3
orf19.943	FET33	Plate 14	E12	3	3
orf19.7551	ALO1	Plate 14	F01	3	3
orf19.1357	FCY21	Plate 14	F02	3	3
orf19.4199		Plate 14	F03	3	3
orf19.4077	MIT1	Plate 14	F04	3	3
orf19.923	THR1	Plate 14	F05	3	2
orf19.4318	MIG1	Plate 14	F06	3	3
orf19.3658		Plate 14	F07	3	3
orf19.1167		Plate 14	F08	3	3
orf19.2939		Plate 14	F09	3	3
orf19.2943	DIP5	Plate 14	F10	3	3
orf19.2555	URA5	Plate 14	F11	3	3
orf19.2444	CHS7	Plate 14	F12	3	1
orf19.5818	SUR2	Plate 14	G01	3	1
orf19.1978	GIT2	Plate 14	G02	3	3
orf19.97	CAN1	Plate 14	G03	3	3
orf19.111	CAN2	Plate 14	G04	3	3
orf19.1153	GAD1	Plate 14	G05	3	3
orf19.2602	OPT1	Plate 14	G06	3	3
orf19.309	DAL5	Plate 14	G07	3	3
orf19.5713	YMX6	Plate 14	G08	3	3
orf19.4063	GPT1	Plate 14	G09	3	3
orf19.2170	PHM7	Plate 14	G10	3	3
orf19.1311	SPO75	Plate 14	G11	3	3
orf19.5037	HRQ2	Plate 14	G12	3	3
orf19.6305		Plate 14	H01	3	3
orf19.3577	COQ5	Plate 14	H02	3	2
orf19.5384	CHS8	Plate 14	H03	3	3
orf19.7566		Plate 14	H04	3	3
orf19.1837	TBP1	Plate 14	H05	3	1
orf19.5232	CSI2	Plate 14	H06	3	1
orf19.2488	FAL1	Plate 14	H07	3	3
orf19.672		Plate 14	H08	3	3
orf19.4191	RLP24	Plate 14	H09	3	3
orf19.2708		Plate 14	H10	3	3
orf19.6039		Plate 14	H11	3	0
orf19.6175		Plate 14	H12	3	0
orf19.2402	SSU72	Plate 15	A01	3	3
orf19.7618		Plate 15	A02	3	1
orf19.2518		Plate 15	A03	3	NA
orf19.5567	POP4	Plate 15	A04	3	3
orf19.706	NMD3	Plate 15	A05	3	1
orf19.516		Plate 15	A06	3	3
orf19.4582		Plate 15	A07	3	2
orf19.684		Plate 15	A08	3	2
orf19.2104		Plate 15	A09	3	3
orf19.7657	POP3	Plate 15	A10	3	3
orf19.4221	ORC4	Plate 15	A11	3	3
orf19.76	SPB1	Plate 15	A12	1	NA
orf19.3276	PWP2	Plate 15	B01	3	0
orf19.6417	TSR1	Plate 15	B02	3	1
orf19.4628		Plate 15	B03	3	3
orf19.6239		Plate 15	B04	3	3
orf19.4618	FBA1	Plate 15	B05	3	0
orf19.1305		Plate 15	B06	3	0
orf19.5432	TPT1	Plate 15	B07	3	3
orf19.6879		Plate 15	B08	3	3
orf19.3590	IPP1	Plate 15	B09	3	1
orf19.661	KRR1	Plate 15	B10	2	1
orf19.7644		Plate 15	B11	3	3
orf19.6424		Plate 15	B12	3	3
orf19.1299	RPN6	Plate 15	C01	3	3
orf19.2720		Plate 15	C02	2	1
orf19.1742	HEM3	Plate 15	C03	3	1
orf19.526	NHP2	Plate 15	C04	3	3
orf19.7477	YRB1	Plate 15	C05	3	2
orf19.6910	PSF1	Plate 15	C06	3	3
orf19.269	SES1	Plate 15	C07	3	0
orf19.6749	KRS1	Plate 15	C08	3	1
orf19.401	TCP1	Plate 15	C09	3	NA
orf19.528	SEC26	Plate 15	C10	3	NA
orf19.4078		Plate 15	C11	3	2
orf19.2799	GPI8	Plate 15	C12	3	1
orf19.4726		Plate 15	D01	3	3
orf19.5074		Plate 15	D02	3	3
orf19.5793	PR26	Plate 15	D03	3	3
orf19.3347	RPB7	Plate 15	D04	3	2
orf19.2893		Plate 15	D05	3	3
orf19.7236	TIF35	Plate 15	D06	2	0
orf19.410		Plate 15	D07	3	3
orf19.1115	GUK1	Plate 15	D08	3	2
orf19.6696	TIM9	Plate 15	D09	3	0
orf19.2960	FRS2	Plate 15	D10	3	0
orf19.3628	RSP5	Plate 15	D11	3	2
orf19.4025	PRE1	Plate 15	D12	3	2
orf19.3054	RPN3	Plate 15	E01	3	2
orf19.4154		Plate 15	E02	3	1
orf19.2417	SMC5	Plate 15	E03	3	1
orf19.4028		Plate 15	E04	3	3
orf19.1279	CDS1	Plate 15	E05	2	1
orf19.2756		Plate 15	E06	3	2
orf19.2796		Plate 15	E07	3	3
orf19.5528	MOB1	Plate 15	E08	3	3
orf19.2093	RFA1	Plate 15	E09	3	2
orf19.514	SNP3	Plate 15	E10	3	3
orf19.930	PET9	Plate 15	E11	2	1
orf19.2138	ILS1	Plate 15	E12	3	0
orf19.3673		Plate 15	F01	3	0
orf19.2688	NAN1	Plate 15	F02	3	1
orf19.6252		Plate 15	F03	3	2
orf19.5076	PFY1	Plate 15	F04	3	2
orf19.6642		Plate 15	F05	3	1
orf19.5817		Plate 15	F06	3	3
orf19.3951	TIP1	Plate 15	F07	3	0
orf19.5010	DIM1	Plate 15	F08	3	1
orf19.1814	STT4	Plate 15	F09	3	2
orf19.6131	KSR1	Plate 15	F10	3	2
orf19.4606	ERG8	Plate 15	F11	3	0
orf19.4863	PDC2	Plate 15	F12	3	3
orf19.3256	SLN1	Plate 15	G01	3	3
orf19.1589		Plate 15	G02	3	2
orf19.4448	SOG2	Plate 15	G03	3	2
orf19.2041		Plate 15	G04	3	3
orf19.2507	ARP9	Plate 15	G05	3	1
orf19.5356		Plate 15	G06	3	0
orf19.1609		Plate 15	G07	3	3
orf19.3116	EXM2	Plate 15	G08	3	1
orf19.1885	TAF4	Plate 15	G09	3	2
orf19.2922		Plate 15	G10	3	3
orf19.680	TIM50	Plate 15	G11	3	0
orf19.2820		Plate 15	G12	3	3
orf19.4871	ERO1	Plate 15	H01	3	3
orf19.7037	YAE1	Plate 15	H02	3	3
orf19.135	EXO84	Plate 15	H03	3	3
orf19.3322	DUT1	Plate 15	H04	3	3
orf19.3317	MED22	Plate 15	H05	3	2
orf19.3314		Plate 15	H06	3	2
orf19.5130	PDI1	Plate 15	H07	3	1
orf19.3778		Plate 15	H08	1	1
orf19.4724		Plate 15	H09	3	1
orf19.5200	SIT4	Plate 15	H10	3	2
orf19.5647	SUB2	Plate 15	H11	3	1
orf19.6524	TOM40	Plate 15	H12	3	0
orf19.2830	RRP9	Plate 16	A01	3	0
orf19.1769		Plate 16	A02	3	3
orf19.5492		Plate 16	A03	3	2
orf19.302		Plate 16	A04	3	3
orf19.1646		Plate 16	A05	3	1
orf19.5407	SOF1	Plate 16	A06	3	1
orf19.4835		Plate 16	A07	3	0
orf19.6044	MOB2	Plate 16	A08	3	2
orf19.498		Plate 16	A09	3	2
orf19.7597	PGA12	Plate 16	A10	3	3
orf19.3575	CDC19	Plate 16	A11	3	0
orf19.5131		Plate 16	A12	3	3
orf19.2117	LEU5	Plate 16	B01	3	3
orf19.3324	TIF	Plate 16	B02	0	0
orf19.5858	EGD2	Plate 16	B03	3	3
orf19.984	PHO8	Plate 16	B04	3	3
orf19.2607		Plate 16	B05	3	3
orf19.4106		Plate 16	B06	3	3
orf19.2803	HEM13	Plate 16	B07	3	3
orf19.936		Plate 16	B08	2	3
orf19.7382	CAM1	Plate 16	B09	3	3
orf19.7561	DEF1	Plate 16	B10	3	3
orf19.5926	ARG11	Plate 16	B11	3	3
orf19.641		Plate 16	B12	3	3
orf19.6169	ATO1	Plate 16	C01	3	3
orf19.6858	EDC3	Plate 16	C02	3	3
orf19.7269		Plate 16	C03	3	3
orf19.4195.1	FCA1	Plate 16	C04	3	3
orf19.3534	RHO3	Plate 16	C05	3	3
orf19.4274	PUT1	Plate 16	C06	3	3
orf19.1395		Plate 16	C07	3	3
orf19.2095		Plate 16	C08	3	3
orf19.3047		Plate 16	C09	3	3
orf19.2131		Plate 16	C10	3	3
orf19.2143		Plate 16	C11	3	3
orf19.2146	HAT2	Plate 16	C12	3	3
orf19.6322	ARD	Plate 16	D01	3	3
orf19.2311	RPL82	Plate 16	D02	3	3
orf19.28		Plate 16	D03	3	3
orf19.5760	IHD1	Plate 16	D04	3	3
orf19.6382		Plate 16	D05	3	3
orf19.2028	MXR1	Plate 16	D06	3	3
orf19.2098	ARO8	Plate 16	D07	3	3
orf19.6045		Plate 16	D08	2	2
orf19.7231	FTR2	Plate 16	D09	3	3
orf19.5229		Plate 16	D10	3	3
orf19.4497	MED8	Plate 16	D11	0	NA
orf19.1111		Plate 16	D12	3	3
orf19.1661	DBP5	Plate 16	E01	3	3
orf19.5416	ESA1	Plate 16	E02	3	3
orf19.7635	DRS1	Plate 16	E03	3	3
orf19.1413	YFH1	Plate 16	E04	3	3
orf19.6913	GCN2	Plate 16	E05	3	3
orf19.4341		Plate 16	E06	3	3
orf19.3207	CCN1	Plate 16	E07	3	3
orf19.57	PSF2	Plate 16	E08	3	3
orf19.2909	ERG26	Plate 16	E09	3	3
orf19.5156		Plate 16	E10	NA	NA
orf19.6529	CDC34	Plate 16	E11	3	3
orf19.3166		Plate 16	E12	3	3
orf19.1803	CDC43	Plate 16	F01	0	0
orf19.583		Plate 16	F02	3	3
orf19.3567	BIO32	Plate 16	F03	3	3
orf19.1180		Plate 16	F04	3	3
orf19.4899	GCA1	Plate 16	F05	3	3
orf19.4128		Plate 16	F06	3	3
orf19.2626	RGD3	Plate 16	F07	3	3
orf19.1891	APR1	Plate 16	F08	3	3
orf19.1881		Plate 16	F09	3	3
orf19.1871		Plate 16	F10	3	3
orf19.1865		Plate 16	F11	3	3
orf19.496		Plate 16	F12	3	3
orf19.1477		Plate 16	G01	3	3
orf19.1468		Plate 16	G02	3	2
orf19.1462	SMP2	Plate 16	G03	3	2
orf19.6875	VPS35	Plate 16	G04	3	3
orf19.6904	GCN3	Plate 16	G05	3	2
orf19.6915	MRE11	Plate 16	G06	3	3
orf19.3298	CCH1	Plate 16	G07	3	3
orf19.3307		Plate 16	G08	3	3
orf19.350	PRE9	Plate 16	G09	3	3
orf19.4447	YMC1	Plate 16	G10	3	3
orf19.897	VPS20	Plate 16	G11	3	3
orf19.6933		Plate 16	G12	3	3
orf19.4845		Plate 16	H01	3	3
orf19.6981		Plate 16	H02	3	3
orf19.6990		Plate 16	H03	3	3
orf19.3029		Plate 16	H04	3	3
orf19.3035		Plate 16	H05	3	3
orf19.3049		Plate 16	H06	3	3
orf19.6425		Plate 16	H07	3	3
orf19.4587	HGH1	Plate 16	H08	3	3
orf19.7029		Plate 16	H09	3	3
orf19.5025	MET3	Plate 16	H10	3	3
orf19.5004	RAD54	Plate 16	H11	3	3
orf19.7152		Plate 16	H12	3	3
orf19.7156	FAA2-3	Plate 17	A01	3	3
orf19.5720		Plate 17	A02	3	3
orf19.3402	FPG1	Plate 17	A03	3	3
orf19.1719	SGA1	Plate 17	A04	3	2
orf19.6195		Plate 17	A05	3	3
orf19.6138		Plate 17	A06	3	3
orf19.2484		Plate 17	A07	3	3
orf19.2008		Plate 17	A08	3	3
orf19.6699		Plate 17	A09	3	3
orf19.5658	MNN10	Plate 17	A10	3	3
orf19.6190	SRB1	Plate 17	A11	2	0
orf19.6828.1		Plate 17	A12	3	1
orf19.3034	RLI1	Plate 17	B01	2	0
orf19.3242		Plate 17	B02	3	2
orf19.1378	SUP35	Plate 17	B03	3	3
orf19.744	GDB1	Plate 17	B04	3	3
orf19.5377	HOS2	Plate 17	B05	3	3
orf19.5480	ILV1	Plate 17	B06	3	3
orf19.5484	SER1	Plate 17	B07	3	3
orf19.3751		Plate 17	B08	3	3
orf19.3542	LEM3	Plate 17	B09	3	1
orf19.299	ECM14	Plate 17	B10	3	3
orf19.4940		Plate 17	B11	3	3
orf19.7604		Plate 17	B12	3	3
orf19.607		Plate 17	C01	3	3
orf19.5865		Plate 17	C02	3	2
orf19.4841	SHY1	Plate 17	C03	1	0
orf19.4827	ADE12	Plate 17	C04	3	NA
orf19.4826	IDH1	Plate 17	C05	1	0
orf19.2092		Plate 17	C06	3	3
orf19.2073		Plate 17	C07	3	3
orf19.2067		Plate 17	C08	3	3
orf19.3811	GYP1	Plate 17	C09	3	2
orf19.3822	SCS7	Plate 17	C10	3	3
orf19.3841		Plate 17	C11	3	3
orf19.6558		Plate 17	C12	3	3
orf19.6561	LAT1	Plate 17	D01	3	2
orf19.6041	RPO41	Plate 17	D02	2	0
orf19.6058	GLO1	Plate 17	D03	3	3
orf19.6070	ENA2	Plate 17	D04	3	3
orf19.6533	MSK1	Plate 17	D05	3	1
orf19.5280	MUP1	Plate 17	D06	3	3
orf19.5265	KIP4	Plate 17	D07	3	3
orf19.5263	SER33	Plate 17	D08	3	3
orf19.5253		Plate 17	D09	3	3
orf19.4297	CKB2	Plate 17	D10	3	3
orf19.606		Plate 17	D11	3	3
orf19.1324	RAD2	Plate 17	D12	3	3
orf19.6385	ACO1	Plate 17	E01	3	0
orf19.3870	ADE13	Plate 17	E02	3	1
orf19.2251	AAH1	Plate 17	E03	3	3
orf19.4932		Plate 17	E04	3	0
orf19.2031	VPS24	Plate 17	E05	3	3
orf19.2043		Plate 17	E06	3	3
orf19.2046	POT1-2	Plate 17	E07	3	3
orf19.2050		Plate 17	E08	3	3
orf19.4945	MSH6	Plate 17	E09	3	3
orf19.6063	UBP6	Plate 17	E10	3	3
orf19.6237	RAC1	Plate 17	E11	2	2
orf19.6306		Plate 17	E12	3	3
orf19.2306		Plate 17	F01	3	3
orf19.1936	SNF1	Plate 17	F02	2	3
orf19.3982		Plate 17	F03	3	3
orf19.6011	SIN3	Plate 17	F04	3	2
orf19.2425	HGT18	Plate 17	F05	3	3
orf19.2415		Plate 17	F06	3	2
orf19.6178	FBP1	Plate 17	F07	3	3
orf19.6287	AAT21	Plate 17	F08	3	3
orf19.7390	REV3	Plate 17	F09	3	2
orf19.2124		Plate 17	F10	3	3
orf19.5986	THI4	Plate 17	F11	3	3
orf19.5752		Plate 17	F12	3	3
orf19.5747		Plate 17	G01	3	1
orf19.3482		Plate 17	G02	3	3
orf19.5862	AFP99	Plate 17	G03	3	3
orf19.4283		Plate 17	G04	3	NA
orf19.3710	YHB5	Plate 17	G05	3	3
orf19.6152		Plate 17	G06	3	3
orf19.4630	CPA1	Plate 17	G07	3	3
orf19.7213		Plate 17	G08	3	3
orf19.3249	LAG1	Plate 17	G09	3	2
orf19.5641	CAR2	Plate 17	G10	3	3
orf19.4201	NHX1	Plate 17	G11	3	3
orf19.354		Plate 17	G12	3	3
orf19.4446		Plate 17	H01	3	3
orf19.6928	SAP9	Plate 17	H02	3	3
orf19.4610		Plate 17	H03	3	3
orf19.7010		Plate 17	H04	3	3
orf19.7218	RBE1	Plate 17	H05	3	3
orf19.7336		Plate 17	H06	3	3
orf19.7095		Plate 17	H07	3	3
orf19.1415	FRE10	Plate 17	H08	3	3
orf19.1545		Plate 17	H09	3	0
orf19.524		Plate 17	H10	3	3
orf19.5656		Plate 17	H11	3	3
orf19.5661	PTC7	Plate 17	H12	3	3
orf19.5673	OPT7	Plate 18	A01	3	3
orf19.5677	DUR4	Plate 18	A02	3	3
orf19.5160		Plate 18	A03	3	2
orf19.6886		Plate 18	A04	3	2
orf19.6900		Plate 18	A05	3	3
orf19.2436		Plate 18	A06	3	3
orf19.2438		Plate 18	A07	3	1
orf19.4186	PCT1	Plate 18	A08	3	3
orf19.763		Plate 18	A09	3	3
orf19.5224		Plate 18	A10	3	3
orf19.685	YHM1	Plate 18	A11	3	3
orf19.3089		Plate 18	A12	3	3
orf19.3463		Plate 18	B01	3	2
orf19.4356	HGT3	Plate 18	B02	3	3
orf19.2640	FUR1	Plate 18	B03	3	3
orf19.1760	RAS1	Plate 18	B04	3	3
orf19.2601	HEM1	Plate 18	B05	3	1
orf19.5550	MRT4	Plate 18	B06	3	3
orf19.742	ALD6	Plate 18	B07	3	3
orf19.4897		Plate 18	B08	3	3
orf19.4233	THR4	Plate 18	B09	3	3
orf19.6230		Plate 18	B10	3	3
orf19.6328		Plate 18	B11	3	2
orf19.2998	TSR2	Plate 18	B12	3	3
orf19.4375		Plate 18	C01	3	3
orf19.1333	SNG3	Plate 18	C02	3	3
orf19.600	TRK1	Plate 18	C03	3	3
orf19.956		Plate 18	C04	3	3
orf19.4569		Plate 18	C05	3	3
orf19.6522		Plate 18	C06	3	3
orf19.5495		Plate 18	C07	2	3
orf19.5517		Plate 18	C08	3	3
orf19.4506	LYS22	Plate 18	C09	3	3
orf19.6214	ATC1	Plate 18	C10	3	3
orf19.2953	TOM20	Plate 18	C11	3	2
orf19.1235	HOM3	Plate 18	C12	3	3
orf19.7298	CHS2	Plate 18	D01	3	3
orf19.2862	RIB1	Plate 18	D02	3	0
orf19.2534	PIN4	Plate 18	D03	3	3
orf19.4679	AGP2	Plate 18	D04	3	3
orf19.3591	APE3	Plate 18	D05	3	3
orf19.1308		Plate 18	D06	3	3
orf19.2454	PHO87	Plate 18	D07	3	3
orf19.2821		Plate 18	D08	2	3
orf19.633		Plate 18	D09	2	3
orf19.3395		Plate 18	D10	3	3
orf19.2964		Plate 18	D11	3	3
orf19.4633		Plate 18	D12	3	3
orf19.785	FLC2	Plate 18	E01	3	3
orf19.2693	GST2	Plate 18	E02	3	3
orf19.6043		Plate 18	E03	3	3
orf19.5005	OSM2	Plate 18	E04	3	3
orf19.7397		Plate 18	E05	3	3
orf19.1658		Plate 18	E06	3	2
orf19.5672	MEP2	Plate 18	E07	3	3
orf19.3121	GST1	Plate 18	E08	3	3
orf19.6766		Plate 18	E09	3	3
orf19.4802	FTH1	Plate 18	E10	3	3
orf19.355		Plate 18	E11	3	3
orf19.2703		Plate 18	E12	3	3
orf19.6057		Plate 18	F01	3	0
orf19.4475	KTR4	Plate 18	F02	3	3
orf19.2007		Plate 18	F03	3	3
orf19.3770	ARG8	Plate 18	F04	3	3
orf19.313	DAL4	Plate 18	F05	3	3
orf19.2771	BEM3	Plate 18	F06	3	3
orf19.3208	DAL52	Plate 18	F07	3	3
orf19.4705		Plate 18	F08	3	NA
orf19.1960	CLN3	Plate 18	F09	3	3
orf19.137		Plate 18	F10	3	3
orf19.3649		Plate 18	F11	3	3
orf19.7327	PHO88	Plate 18	F12	2	3
orf19.1364		Plate 18	G01	3	3
orf19.553		Plate 18	G02	3	3
orf19.5118	SDS24	Plate 18	G03	3	3
orf19.5869		Plate 18	G04	3	3
orf19.4548	MAK32	Plate 18	G05	3	3
orf19.3558		Plate 18	G06	3	3
orf19.7367	UBP1	Plate 18	G07	3	3
orf19.403	PCL2	Plate 18	G08	3	3
orf19.52		Plate 18	G09	3	3
orf19.3139		Plate 18	G10	3	3
orf19.7359	CRZ1	Plate 18	G11	3	3
orf19.7517	CHT1	Plate 18	G12	3	3
orf19.4769	IPT1	Plate 18	H01	3	2
orf19.3930	YUH2	Plate 18	H02	3	3
orf19.3415	PTK2	Plate 18	H03	3	2
orf19.1699	BZZ1	Plate 18	H04	3	3
orf19.1236		Plate 18	H05	2	3
orf19.212	VPS28	Plate 18	H06	3	3
orf19.4183	MUC1	Plate 18	H07	2	2
orf19.5903	RAX1	Plate 18	H08	3	3
orf19.3603	MFG1	Plate 18	H09	3	3
orf19.1555	SAC3	Plate 18	H10	3	2
orf19.6877	PNG2	Plate 18	H11	3	3
orf19.2940		Plate 18	H12	3	3
orf19.3609	UTP15	Plate 19	A01	3	1
orf19.979	FAS1	Plate 19	A02	3	0
orf19.1285		Plate 19	A03	3	3
orf19.5816	EBP7	Plate 19	A04	3	3
orf19.4240		Plate 19	A05	3	2
orf19.1639		Plate 19	A06	3	3
orf19.6727	RIT1	Plate 19	A07	3	3
orf19.349		Plate 19	A08	3	3
orf19.7577	MSS51	Plate 19	A09	3	2
orf19.1130		Plate 19	A10	3	3
orf19.5925		Plate 19	A11	3	3
orf19.7516		Plate 19	A12	3	3
orf19.4211	FET3	Plate 19	B01	3	2
orf19.4760		Plate 19	B02	3	3
orf19.216		Plate 19	B03	3	3
orf19.5849	CWT1	Plate 19	B04	3	2
orf19.2423	ZCF11	Plate 19	B05	3	3
orf19.991	DJP1	Plate 19	B06	3	3
orf19.1493	RAD7	Plate 19	B07	3	3
orf19.5978		Plate 19	B08	3	3
orf19.4546	HOL4	Plate 19	B09	3	3
orf19.1799	GAP5	Plate 19	B10	3	3
orf19.4287		Plate 19	B11	3	3
orf19.5592		Plate 19	B12	3	3
orf19.1171		Plate 19	C01	3	3
orf19.6449		Plate 19	C02	3	3
orf19.3929		Plate 19	C03	3	3
orf19.5749	SBA1	Plate 19	C04	3	3
orf19.6398		Plate 19	C05	3	3
orf19.125	EBP1	Plate 19	C06	3	3
orf19.4060	ARO4	Plate 19	C07	3	1
orf19.2151	NAG6	Plate 19	C08	3	3
orf19.1823		Plate 19	C09	3	3
orf19.6166		Plate 19	C10	2	2
orf19.7158		Plate 19	C11	3	3
orf19.857	FMO2	Plate 19	C12	3	3
orf19.5455		Plate 19	D01	3	3
orf19.2681	RBT7	Plate 19	D02	3	3
orf19.5780		Plate 19	D03	3	3
orf19.5859	DAL8	Plate 19	D04	3	3
orf19.4210		Plate 19	D05	3	3
orf19.4688	DAG7	Plate 19	D06	3	3
orf19.1663	MNT2	Plate 19	D07	3	3
orf19.105	HAL22	Plate 19	D08	2	3
orf19.3203	RCY1	Plate 19	D09	3	3
orf19.56	ARG2	Plate 19	D10	3	3
orf19.4171		Plate 19	D11	3	3
orf19.1583		Plate 19	D12	3	3
orf19.4142		Plate 19	E01	3	2
orf19.6185		Plate 19	E02	3	3
orf19.592		Plate 19	E03	3	2
orf19.7247	RIM101	Plate 19	E04	3	2
orf19.183	HIS3	Plate 19	E05	3	3
orf19.238	CCP1	Plate 19	E06	3	3
orf19.3151		Plate 19	E07	3	3
orf19.6772	EMC29	Plate 19	E08	3	3
orf19.1946		Plate 19	E09	3	3
orf19.5615	AYR2	Plate 19	E10	3	3
orf19.7475	PHO81	Plate 19	E11	3	3
orf19.5971		Plate 19	E12	3	3
orf19.7257		Plate 19	F01	3	3
orf19.2563		Plate 19	F02	3	1
orf19.5894		Plate 19	F03	3	3
orf19.4743	AFG1	Plate 19	F04	3	3
orf19.1641		Plate 19	F05	3	2
orf19.4351	PRP13	Plate 19	F06	3	3
orf19.4771		Plate 19	F07	3	3
orf19.7650	LTV1	Plate 19	F08	3	2
orf19.7219	FTR1	Plate 19	F09	3	3
orf19.4424	PHO100	Plate 19	F10	3	2
orf19.835		Plate 19	F11	3	3
orf19.733		Plate 19	F12	3	3
orf19.1345	LIP8	Plate 19	G01	3	3
orf19.1142		Plate 19	G02	3	3
orf19.1193	GNP1	Plate 19	G03	3	3
orf19.2798		Plate 19	G04	3	3
orf19.7486	MRPL6	Plate 19	G05	3	0
orf19.6747		Plate 19	G06	2	3
orf19.4376		Plate 19	G07	3	3
orf19.7629		Plate 19	G08	3	3
orf19.6096	TRP1	Plate 19	G09	3	3
orf19.2385	KTI12	Plate 19	G10	3	3
orf19.851		Plate 19	G11	3	3
orf19.2496	ATO2	Plate 19	G12	3	3
orf19.2391		Plate 19	H01	3	2
orf19.7111		Plate 19	H02	3	3
orf19.457		Plate 19	H03	3	3
orf19.2996		Plate 19	H04	3	3
orf19.6061		Plate 19	H05	3	3
orf19.1063		Plate 19	H06	3	3
orf19.764		Plate 19	H07	3	3
orf19.795	VPS36	Plate 19	H08	3	3
orf19.4560	BFR1	Plate 19	H09	3	3
orf19.1698		Plate 19	H10	3	2
orf19.3705	PTC6	Plate 19	H11	3	3
orf19.4779		Plate 19	H12	3	3
orf19.2791	BBC1	Plate 20	A01	3	3
orf19.2945	PUT4	Plate 20	A02	3	3
orf19.5103		Plate 20	A03	3	3
orf19.4326		Plate 20	A04	3	2
orf19.6956	DAL9	Plate 20	A05	3	3
orf19.5307	JEN2	Plate 20	A06	3	3
orf19.3458		Plate 20	A07	3	3
orf19.2977	MIA40	Plate 20	A08	3	1
orf19.3910		Plate 20	A09	3	3
orf19.1847	ARO10	Plate 20	A10	3	3
orf19.2309		Plate 20	A11	3	3
orf19.5071	NRP1	Plate 20	A12	3	3
orf19.4783		Plate 20	B01	3	3
orf19.23	RTA3	Plate 20	B02	3	3
orf19.4151	SPO1	Plate 20	B03	3	3
orf19.4136	YBL053	Plate 20	B04	3	3
orf19.3417	ACF2	Plate 20	B05	3	3
orf19.1170	ARO7	Plate 20	B06	3	2
orf19.4187		Plate 20	B07	3	2
orf19.1160		Plate 20	B08	3	3
orf19.5662	PEP7	Plate 20	B09	3	3
orf19.2942	DIP5	Plate 20	B10	3	3
orf19.6020		Plate 20	B11	3	3
orf19.3966	CRH12	Plate 20	B12	3	3
orf19.3689		Plate 20	C01	3	3
orf19.658	GIN1	Plate 20	C02	2	3
orf19.4312		Plate 20	C03	NA	1
orf19.4494	KTR2	Plate 20	C04	3	3
orf19.3920		Plate 20	C05	3	3
orf19.5228	RIB3	Plate 20	C06	3	3
orf19.1159		Plate 20	C07	3	3
orf19.5496	AVT1	Plate 20	C08	3	3
orf19.2198	FLC3	Plate 20	C09	3	3
orf19.2411		Plate 20	C10	3	3
orf19.1449		Plate 20	C11	3	3
orf19.234	PHA2	Plate 20	C12	3	3
orf19.983		Plate 20	D01	3	3
orf19.6167	AYR1	Plate 20	D02	3	3
orf19.6202	RBT4	Plate 20	D03	2	3
orf19.2347	MNN2	Plate 20	D04	3	3
orf19.1363		Plate 20	D05	3	3
orf19.2197		Plate 20	D06	3	3
orf19.1381		Plate 20	D07	3	3
orf19.6297		Plate 20	D08	1	1
orf19.1832	FCY23	Plate 20	D09	3	3
orf19.6905		Plate 20	D10	3	3
orf19.2583	PTR2	Plate 20	D11	3	3
orf19.5789	ADE8	Plate 20	D12	3	3
orf19.5064	MRPL3	Plate 20	E01	3	0
orf19.304		Plate 20	E02	3	3
orf19.5437	RHR2	Plate 20	E03	3	3
orf19.5906	ADE2	Plate 20	E04	3	1
orf19.3852		Plate 20	E05	3	3
orf19.6464		Plate 20	E06	3	3
orf19.2882	XUT1	Plate 20	E07	3	3
orf19.1365		Plate 20	E08	3	3
orf19.4229		Plate 20	E09	3	3
orf19.4823	LIP6	Plate 20	E10	3	3
orf19.1709		Plate 20	E11	3	3
orf19.1954	PUS4	Plate 20	E12	3	3
orf19.1270	FRE3	Plate 20	F01	3	3
orf19.651	LYP1	Plate 20	F02	3	3
orf19.2158	NAG3	Plate 20	F03	3	3
orf19.1504		Plate 20	F04	3	3
orf19.3422	FMP27	Plate 20	F05	3	3
orf19.1382	YEA4	Plate 20	F06	3	3
orf19.1509	ROD1	Plate 20	F07	3	3
orf19.6592		Plate 20	F08	3	3
orf19.2749		Plate 20	F09	2	2
orf19.1984		Plate 20	F10	3	3
orf19.4079	SLP2	Plate 20	F11	3	3
orf19.841		Plate 20	F12	3	3
orf19.4288	CTA7	Plate 20	G01	3	3
orf19.4236	RET2	Plate 20	G02	3	NA
orf19.3586		Plate 20	G03	3	3
orf19.5604	MDR1	Plate 20	G04	3	3
orf19.1853	HHT2	Plate 20	G05	3	3
orf19.754	YBN5	Plate 20	G06	3	3
orf19.2149		Plate 20	G07	3	3
orf19.4519	SUV3	Plate 20	G08	0	0
orf19.6358		Plate 20	G09	3	3
orf19.478		Plate 20	G10	3	3
orf19.4855	BUD31	Plate 20	G11	3	3
orf19.1394		Plate 20	G12	3	3
orf19.3915		Plate 20	H01	3	3
orf19.1940		Plate 20	H02	3	2
orf19.1849		Plate 20	H03	3	1
orf19.3980		Plate 20	H04	3	3
orf19.2984	MST1	Plate 20	H05	3	2
orf19.1659	ALG8	Plate 20	H06	3	3
orf19.7324	THI13	Plate 20	H07	3	3
orf19.7391	OCH1	Plate 20	H08	3	2
orf19.1078	HBR2	Plate 20	H09	3	3
orf19.656	DPP1	Plate 20	H10	3	3
orf19.4339	VPS4	Plate 20	H11	3	3
orf19.1575	PRS1	Plate 20	H12	3	0
orf19.4334	PGA58	Plate 21	A01	3	3
orf19.4365		Plate 21	A02	3	3
orf19.2160	NAG4	Plate 21	A03	3	3
orf19.4131		Plate 21	A04	3	3
orf19.6595	RTA4	Plate 21	A05	3	3
orf19.1559	HOM2	Plate 21	A06	3	3
orf19.5667	MNR2	Plate 21	A07	3	3
orf19.769	IFE1	Plate 21	A08	3	3
orf19.3555	BUD14	Plate 21	A09	3	3
orf19.2886	CEK1	Plate 21	A10	3	3
orf19.1836	APN2	Plate 21	A11	3	3
orf19.517	HAP31	Plate 21	A12	3	3
orf19.331		Plate 21	B01	3	2
orf19.2600	SPC98	Plate 21	B02	3	NA
orf19.4551	CTN1	Plate 21	B03	3	3
orf19.3941	URA7	Plate 21	B04	3	NA
orf19.4016		Plate 21	B05	3	0
orf19.3369	MOH1	Plate 21	B06	3	3
orf19.4410	ALG1	Plate 21	B07	3	3
orf19.4473	SPC19	Plate 21	B08	3	NA
orf19.2298	WBP1	Plate 21	B09	3	0
orf19.3037		Plate 21	B10	3	NA
orf19.2857		Plate 21	B11	3	3
orf19.2090		Plate 21	B12	3	1
orf19.3086		Plate 21	C01	3	NA
orf19.1531		Plate 21	C02	3	3
orf19.6863	VPH1	Plate 21	C03	3	3
orf19.6889	MKK2	Plate 21	C04	3	3
orf19.3641	CAN3	Plate 21	C05	3	3
orf19.1033	STR2	Plate 21	C06	3	3
orf19.5530	NAB3	Plate 21	C07	3	3
orf19.7611	TRX1	Plate 21	C08	3	3
orf19.2114		Plate 21	C09	3	3
orf19.5006.1		Plate 21	C10	3	3
orf19.3700	TOM70	Plate 21	C11	3	2
orf19.3290		Plate 21	C12	3	3
orf19.6988	OST1	Plate 21	D01	3	NA
orf19.1586	FGR22	Plate 21	D02	3	3
orf19.2755		Plate 21	D03	3	NA
orf19.1664		Plate 21	D04	3	3
orf19.7594		Plate 21	D05	3	3
orf19.5784	AMO1	Plate 21	D06	3	3
orf19.2461	PRN4	Plate 21	D07	3	3
orf19.3765	RAX2	Plate 21	D08	2	3
orf19.1480		Plate 21	D09	3	0
orf19.5657	SWI1	Plate 21	D10	3	1
orf19.395	ENO1	Plate 21	D11	3	0
orf19.494		Plate 21	D12	3	3
orf19.4822	LIP10	Plate 21	E01	3	2
orf19.6977	GPI1	Plate 21	E02	3	3
orf19.10	ALK8	Plate 21	E03	3	3
orf19.211		Plate 21	E04	3	3
orf19.5921		Plate 21	E05	3	3
orf19.781	DUR31	Plate 21	E06	3	3
orf19.7002		Plate 21	E07	3	3
orf19.2644	QCR2	Plate 21	E08	3	0
orf19.4325		Plate 21	E09	3	2
orf19.4905		Plate 21	E10	3	3
orf19.428		Plate 21	E11	3	3
orf19.3544		Plate 21	E12	2	3
orf19.2772	HOS3	Plate 21	F01	3	2
orf19.444		Plate 21	F02	3	3
orf19.4006		Plate 21	F03	3	3
orf19.5553		Plate 21	F04	3	3
orf19.2762	AHP1	Plate 21	F05	3	3
orf19.1797		Plate 21	F06	3	3
orf19.866	RAD32	Plate 21	F07	3	3
orf19.4718	TRP5	Plate 21	F08	2	2
orf19.5924	ZCF31	Plate 21	F09	3	3
orf19.1911	PGA52	Plate 21	F10	3	3
orf19.3230	BOI2	Plate 21	F11	2	2
orf19.2792	IST2	Plate 21	F12	2	3
orf19.3391	ADK1	Plate 21	G01	3	2
orf19.5295		Plate 21	G02	3	3
orf19.7479	NTH1	Plate 21	G03	3	3
orf19.1608		Plate 21	G04	1	1
orf19.2467	PRN1	Plate 21	G05	3	3
[truncated: 372 more rows]

## Sheet: 322 Primary hits
GdA morphology indicates the scale of filamentation of the strain grown in the presence of 10 µM GdA for 6 hours in the arrayed screen (where 0=yeast, 3=filamentous)
GdA plus DOX morphology indicates the scale of filamentation when grown in YPD + 0.05μg/mL DOX with 10 µM GdA for 6 hours in the arrayed screen (where 0=yeast, 3=filamentous)
orf19	Common	Plate	Position	GdA morphology	GdA +DOX morphology
orf19.1199	NOP5	Plate 01	A07	3	0
orf19.3243	SRP54	Plate 01	A08	3	1
orf19.6217	PGA63	Plate 01	A10	3	0
orf19.1031	HMG1	Plate 01	B07	3	1
orf19.6151	ARC15	Plate 01	B12	3	0
orf19.5360	RPC11	Plate 01	C02	3	1
orf19.7064	GLN4	Plate 01	E01	3	0
orf19.2847		Plate 01	F02	3	1
orf19.2504	BMS1	Plate 01	F09	3	1
orf19.1591	ERG10	Plate 01	F10	3	1
orf19.7384	NOG1	Plate 01	F12	3	1
orf19.5379	ERG4	Plate 01	G07	1	1
orf19.6345	RPG1A	Plate 01	G10	2	1
orf19.1672		Plate 01	G12	3	0
orf19.1631	ERG6	Plate 01	H04	3	0
orf19.5861	KRE9	Plate 01	H12	3	0
orf19.3341		Plate 02	A05	3	0
orf19.418	KOG1	Plate 02	A07	3	0
orf19.4336	RPS5	Plate 02	A11	1	0
orf19.2760		Plate 02	B03	3	1
orf19.5577		Plate 02	B04	3	0
orf19.3955	MES1	Plate 02	B05	3	0
orf19.5143	TIM54	Plate 02	C01	3	1
orf19.1598	ERG24	Plate 02	C04	3	0
orf19.3177		Plate 02	C12	3	1
orf19.2330		Plate 02	D01	3	0
orf19.5608		Plate 02	D02	3	1
orf19.7081	SPL1	Plate 02	D06	3	1
orf19.6541	RPL5	Plate 02	D08	2	1
orf19.3087	UBI3	Plate 02	D10	1	0
orf19.5693		Plate 02	D11	2	1
orf19.2013	KAR2	Plate 02	D12	3	0
orf19.2407	DPS1-1	Plate 02	E05	3	0
orf19.6828		Plate 02	E11	3	1
orf19.6213	SUI2	Plate 02	F01	3	0
orf19.5226	WRS1	Plate 02	F06	3	0
orf19.2629		Plate 02	F08	3	1
orf19.3696	TOM22	Plate 02	F10	3	1
orf19.3098		Plate 02	F12	3	0
orf19.6438	LCB1	Plate 02	G01	3	0
orf19.6105	MVD	Plate 02	G02	3	0
orf19.4635	NIP1	Plate 02	G06	1	0
orf19.2404		Plate 02	G09	3	1
orf19.941	SEC14	Plate 02	G10	3	1
orf19.1902	NOC4	Plate 02	G11	3	0
orf19.4491	ERG20	Plate 02	H05	3	0
orf19.5765		Plate 02	H06	3	1
orf19.1839	RPA190	Plate 02	H10	3	0
orf19.5746	ALA1	Plate 02	H11	3	0
orf19.3651	PGK1	Plate 03	A01	3	1
orf19.2260		Plate 03	A02	3	1
orf19.6046	APC1	Plate 03	A04	3	1
orf19.7062	RPA135	Plate 03	A08	3	1
orf19.5516		Plate 03	A12	3	1
orf19.5947	SEC7	Plate 03	B02	3	1
orf19.7215		Plate 03	B03	3	1
orf19.3560	MRPS35	Plate 03	D03	1	0
orf19.5629	QCR7	Plate 03	D08	2	0
orf19.585	MRPL17	Plate 03	E06	3	0
orf19.2283	DQD1	Plate 03	G05	3	1
orf19.6094	VPS53	Plate 04	B01	3	0
orf19.1422	FZO1	Plate 04	B02	3	0
orf19.1910		Plate 04	C04	3	1
orf19.7459		Plate 04	D08	3	1
orf19.5735	CDC50	Plate 04	D12	3	0
orf19.7678	ATP16	Plate 04	E01	3	0
orf19.4809	ERG12	Plate 04	F05	3	0
orf19.2929	GSC1	Plate 04	F06	3	1
orf19.4152	CEF3	Plate 04	F07	2	0
orf19.5463	SEC6	Plate 04	F09	3	0
orf19.3174	CDC24	Plate 04	F11	3	0
orf19.5949	FAS2	Plate 04	F12	3	0
orf19.6511	LIG1	Plate 04	G02	3	0
orf19.4618	FBA1	Plate 04	G06	3	0
orf19.4930	SPC3	Plate 04	H11	3	0
orf19.1528		Plate 05	A12	3	0
orf19.2934		Plate 05	B04	1	1
orf19.3367		Plate 05	B05	3	0
orf19.4176		Plate 05	B11	3	0
orf19.5278	CMD2	Plate 05	C06	3	0
orf19.947	MRP17	Plate 05	D08	2	0
orf19.3624	MSU1	Plate 05	D10	3	1
orf19.3937		Plate 05	D12	1	1
orf19.2418		Plate 05	F12	0	0
orf19.927		Plate 05	G02	3	1
orf19.6035		Plate 05	G06	3	0
orf19.4929		Plate 05	G07	0	0
orf19.144	SNU114	Plate 06	B04	3	1
orf19.1986	ARO2	Plate 06	B08	3	1
orf19.978	BDF1	Plate 06	C02	2	1
orf19.4371	TAL1	Plate 06	C08	3	1
orf19.4754	ZWF1	Plate 06	C10	3	0
orf19.6165	KGD1	Plate 06	E01	3	1
orf19.4035	PGA4	Plate 06	E09	2	1
orf19.4040	ILV3	Plate 06	E10	1	1
orf19.2871	SDH12	Plate 06	F01	3	0
orf19.1966	BUD23	Plate 06	G12	3	1
orf19.6740		Plate 06	H07	3	1
orf19.955		Plate 07	A09	3	1
orf19.7011		Plate 07	C01	3	1
orf19.3064	MRPL27	Plate 07	E01	3	1
orf19.3681		Plate 07	F09	3	0
orf19.2694	TYS1	Plate 07	G01	3	1
orf19.4577.3	TIM10	Plate 07	G04	2	0
orf19.6355		Plate 07	G08	3	1
orf19.7335	PRE8	Plate 07	G09	3	1
orf19.4799		Plate 07	G10	3	0
orf19.7222	PAM16	Plate 07	G12	2	1
orf19.5184		Plate 07	H03	3	1
orf19.4993	SEC18	Plate 07	H04	3	0
orf19.6649	BRF1	Plate 07	H06	3	1
orf19.7552		Plate 07	H07	3	1
orf19.3541	ERF1	Plate 07	H09	3	1
orf19.3873	ARC40	Plate 07	H10	3	0
orf19.5959	NOP14	Plate 08	A01	3	1
orf19.6652	DBP8	Plate 08	A02	3	1
orf19.538		Plate 08	A09	3	1
orf19.2677		Plate 08	B08	3	0
orf19.536		Plate 08	B10	3	1
orf19.7057	GUS1	Plate 08	B12	3	0
orf19.1460		Plate 08	C03	3	1
orf19.4479		Plate 08	C06	3	0
orf19.3234.1	SFT1	Plate 08	C09	3	1
orf19.2672	NCP1	Plate 08	D09	3	1
orf19.603	IMP4	Plate 08	D10	3	1
orf19.4093	PES1	Plate 08	E02	2	0
orf19.5413		Plate 08	E03	3	1
orf19.6738	VAN1	Plate 08	G02	1	1
orf19.2709	ZUO1	Plate 08	G05	3	1
orf19.3251	ARC19	Plate 09	A05	3	0
orf19.1444		Plate 09	A12	3	1
orf19.2275		Plate 09	E12	3	1
orf19.5383	PMA1	Plate 09	F03	3	0
orf19.2571	SEC4	Plate 09	F04	3	0
orf19.4620	TIM12	Plate 09	F05	2	1
orf19.4732	SEC24	Plate 09	F10	3	0
orf19.3300	ZPR1	Plate 09	G04	3	1
orf19.900	NSP1	Plate 09	G06	3	1
orf19.6909		Plate 09	G10	3	1
orf19.3962	HAS1	Plate 09	G11	3	1
orf19.1402	CCT2	Plate 09	H02	3	1
orf19.2843	RHO1	Plate 10	A06	3	0
orf19.922	ERG11	Plate 10	A08	3	0
orf19.2560	CDC60	Plate 10	A10	3	1
orf19.2831	RPC31	Plate 10	B07	3	1
orf19.801	TBF1	Plate 10	B11	3	1
orf19.1945	AUR1	Plate 10	C02	1	0
orf19.2187	ALG7	Plate 10	C07	3	1
orf19.7019	YML6	Plate 10	D04	3	1
orf19.5242	CDC6	Plate 10	D12	3	1
orf19.5027	LCB2	Plate 10	E05	3	0
orf19.2289	ARP3	Plate 10	E10	3	0
orf19.4223	GCD11	Plate 10	E12	2	0
orf19.1570	ERG7	Plate 10	F05	3	1
orf19.596.1	NOP10	Plate 10	F06	3	1
orf19.441	RPT1	Plate 10	F12	3	1
orf19.5425		Plate 10	G04	3	1
orf19.501		Plate 10	G09	2	1
orf19.6312	RPS3	Plate 10	G12	1	1
orf19.1280	SUI1	Plate 10	H02	3	1
orf19.5835		Plate 10	H03	3	1
orf19.512		Plate 10	H05	3	0
orf19.5444	TIM44	Plate 10	H10	3	0
orf19.5198	NOP4	Plate 11	A02	3	1
orf19.5168		Plate 11	A03	3	1
orf19.3970		Plate 11	A08	3	1
orf19.5850	NOC2	Plate 11	A11	3	0
orf19.6373	DCP2	Plate 11	B02	3	0
orf19.6648	SDA1	Plate 11	B03	3	0
orf19.3647	SEC8	Plate 11	C01	3	1
orf19.336	YAH1	Plate 11	C04	3	1
orf19.7563	BET2	Plate 11	C07	3	0
orf19.407	GCD6	Plate 11	C09	3	0
orf19.1896	SSC1	Plate 11	D04	3	0
orf19.640		Plate 11	D07	3	1
orf19.4659		Plate 11	D08	3	1
orf19.4499	RIM2	Plate 11	D09	3	0
orf19.1352	TIM22	Plate 11	D10	3	0
orf19.2362		Plate 11	D11	3	0
orf19.6903		Plate 11	E02	3	1
orf19.4931		Plate 11	E06	3	1
orf19.7312	ERG13	Plate 11	F03	3	0
orf19.1761	OST2	Plate 11	F11	3	0
orf19.3123	RPT5	Plate 11	G01	2	0
orf19.6314	RPB8	Plate 11	G09	3	1
orf19.5351	TIF11	Plate 11	G12	3	0
orf19.6233		Plate 11	H04	3	1
orf19.688		Plate 11	H12	3	0
orf19.5346		Plate 12	A02	3	1
orf19.7634	MCD1	Plate 12	A12	3	1
orf19.2267	RFA2	Plate 12	B05	3	1
orf19.6052	CNS1	Plate 12	B06	3	0
orf19.2715	RPC53	Plate 12	B10	3	1
orf19.4190	PAM18	Plate 12	B11	3	0
orf19.3304		Plate 12	B12	3	1
orf19.6477		Plate 12	C11	1	1
orf19.3938		Plate 12	D12	3	0
orf19.2214		Plate 12	E10	2	0
orf19.4003	TIP20	Plate 12	F10	2	0
orf19.1220	RVS167	Plate 13	C01	3	0
orf19.3348		Plate 13	C10	3	1
orf19.3607		Plate 13	D02	1	1
orf19.2019		Plate 13	G08	3	1
orf19.2573	FRS1	Plate 14	B05	3	0
orf19.329		Plate 14	B06	3	0
orf19.5106	DIP2	Plate 14	B08	3	0
orf19.4146	SMD3	Plate 14	B09	3	0
orf19.1064	ACS2	Plate 14	B10	3	1
orf19.3026	MAS1	Plate 14	B11	3	0
orf19.1833		Plate 14	B12	3	0
orf19.717	HSP60	Plate 14	C02	3	0
orf19.5486		Plate 14	C04	3	0
orf19.825	GCD7	Plate 14	C05	2	0
orf19.5493	GSP1	Plate 14	C06	2	0
orf19.2183	KRE30	Plate 14	D03	3	0
orf19.6375	RPS20	Plate 14	D04	1	0
orf19.1478	STT3	Plate 14	D05	3	0
orf19.6551		Plate 14	E02	3	1
orf19.2444	CHS7	Plate 14	F12	3	1
orf19.5818	SUR2	Plate 14	G01	3	1
orf19.1837	TBP1	Plate 14	H05	3	1
orf19.5232	CSI2	Plate 14	H06	3	1
orf19.6039		Plate 14	H11	3	0
orf19.6175		Plate 14	H12	3	0
orf19.7618		Plate 15	A02	3	1
orf19.706	NMD3	Plate 15	A05	3	1
orf19.3276	PWP2	Plate 15	B01	3	0
orf19.6417	TSR1	Plate 15	B02	3	1
orf19.4618	FBA1	Plate 15	B05	3	0
orf19.1305		Plate 15	B06	3	0
orf19.3590	IPP1	Plate 15	B09	3	1
orf19.661	KRR1	Plate 15	B10	2	1
orf19.2720		Plate 15	C02	2	1
orf19.1742	HEM3	Plate 15	C03	3	1
orf19.269	SES1	Plate 15	C07	3	0
orf19.6749	KRS1	Plate 15	C08	3	1
orf19.2799	GPI8	Plate 15	C12	3	1
orf19.7236	TIF35	Plate 15	D06	2	0
orf19.6696	TIM9	Plate 15	D09	3	0
orf19.2960	FRS2	Plate 15	D10	3	0
orf19.4154		Plate 15	E02	3	1
orf19.2417	SMC5	Plate 15	E03	3	1
orf19.1279	CDS1	Plate 15	E05	2	1
orf19.930	PET9	Plate 15	E11	2	1
orf19.2138	ILS1	Plate 15	E12	3	0
orf19.3673		Plate 15	F01	3	0
orf19.2688	NAN1	Plate 15	F02	3	1
orf19.6642		Plate 15	F05	3	1
orf19.3951	TIP1	Plate 15	F07	3	0
orf19.5010	DIM1	Plate 15	F08	3	1
orf19.4606	ERG8	Plate 15	F11	3	0
orf19.2507	ARP9	Plate 15	G05	3	1
orf19.5356		Plate 15	G06	3	0
orf19.3116	EXM2	Plate 15	G08	3	1
orf19.680	TIM50	Plate 15	G11	3	0
orf19.5130	PDI1	Plate 15	H07	3	1
orf19.3778		Plate 15	H08	1	1
orf19.4724		Plate 15	H09	3	1
orf19.5647	SUB2	Plate 15	H11	3	1
orf19.6524	TOM40	Plate 15	H12	3	0
orf19.2830	RRP9	Plate 16	A01	3	0
orf19.1646		Plate 16	A05	3	1
orf19.5407	SOF1	Plate 16	A06	3	1
orf19.4835		Plate 16	A07	3	0
orf19.3575	CDC19	Plate 16	A11	3	0
orf19.3324	TIF	Plate 16	B02	0	0
orf19.1803	CDC43	Plate 16	F01	0	0
orf19.6190	SRB1	Plate 17	A11	2	0
orf19.6828.1		Plate 17	A12	3	1
orf19.3034	RLI1	Plate 17	B01	2	0
orf19.3542	LEM3	Plate 17	B09	3	1
orf19.4841	SHY1	Plate 17	C03	1	0
orf19.4826	IDH1	Plate 17	C05	1	0
orf19.6041	RPO41	Plate 17	D02	2	0
orf19.6533	MSK1	Plate 17	D05	3	1
orf19.6385	ACO1	Plate 17	E01	3	0
orf19.3870	ADE13	Plate 17	E02	3	1
orf19.4932		Plate 17	E04	3	0
orf19.5747		Plate 17	G01	3	1
orf19.1545		Plate 17	H09	3	0
orf19.2438		Plate 18	A07	3	1
orf19.2601	HEM1	Plate 18	B05	3	1
orf19.2862	RIB1	Plate 18	D02	3	0
orf19.6057		Plate 18	F01	3	0
orf19.3609	UTP15	Plate 19	A01	3	1
orf19.979	FAS1	Plate 19	A02	3	0
orf19.4060	ARO4	Plate 19	C07	3	1
orf19.2563		Plate 19	F02	3	1
orf19.7486	MRPL6	Plate 19	G05	3	0
orf19.2977	MIA40	Plate 20	A08	3	1
orf19.4312		Plate 20	C03	NA	1
orf19.6297		Plate 20	D08	1	1
orf19.5064	MRPL3	Plate 20	E01	3	0
orf19.5906	ADE2	Plate 20	E04	3	1
orf19.4519	SUV3	Plate 20	G08	0	0
orf19.1849		Plate 20	H03	3	1
orf19.1575	PRS1	Plate 20	H12	3	0
orf19.4016		Plate 21	B05	3	0
orf19.2298	WBP1	Plate 21	B09	3	0
orf19.2090		Plate 21	B12	3	1
orf19.1480		Plate 21	D09	3	0
orf19.5657	SWI1	Plate 21	D10	3	1
orf19.395	ENO1	Plate 21	D11	3	0
orf19.2644	QCR2	Plate 21	E08	3	0
orf19.1608		Plate 21	G04	1	1
orf19.2319		Plate 22	B06	3	0
orf19.3496		Plate 22	B07	3	1
orf19.117		Plate 22	C07	3	1
orf19.5081	FUN12	Plate 22	D08	3	0
orf19.3585		Plate 22	D10	3	1
orf19.3126	CCT6	Plate 22	H04	2	1
orf19.6531	NUC2	Plate 23	A08	1	0
orf19.1682		Plate 23	B07	0	0
orf19.5827	BUB2	Plate 23	B12	3	1
orf19.2386		Plate 23	F05	0	1
orf19.3240	ERG27	Plate 23	H05	NA	0
orf19.7088		Plate 24	C04	2	1
orf19.2397		Plate 25	A11	3	0
orf19.4704	ARO1	Plate 25	B06	3	1
orf19.4594		Plate 25	C04	3	1
orf19.4252		Plate 25	E02	3	1
orf19.2115		Plate 25	F07	3	0

## Sheet: 201 hits <50% inhibiton in DOX
Percent growth inhibition of strains in the presence of DOX was calculated relative to the growth of the wild-type strain
orf19	Common	Plate	Position	% Growth inhibiton in DOX
orf19.2862	RIB1	Plate 18	D02	49.9027
orf19.5106	DIP2	Plate 14	B08	49.7727
orf19.3962	HAS1	Plate 09	G11	49.0408
orf19.2504	BMS1	Plate 01	F09	48.3475
orf19.2283	DQD1	Plate 03	G05	47.8756
orf19.1528		Plate 05	A12	47.8178
orf19.501		Plate 10	G09	47.6974
orf19.4312		Plate 20	C03	47.0281
orf19.1598	ERG24	Plate 02	C04	46.4311
orf19.2330		Plate 02	D01	46.3396
orf19.4190	PAM18	Plate 12	B11	44.4954
orf19.512		Plate 10	H05	43.4939
orf19.7064	GLN4	Plate 01	E01	43.2147
orf19.2830	RRP9	Plate 16	A01	43.2098
orf19.536		Plate 08	B10	41.7461
orf19.596.1	NOP10	Plate 10	F06	40.552
orf19.6649	BRF1	Plate 07	H06	40.2968
orf19.5130	PDI1	Plate 15	H07	38.9293
orf19.4146	SMD3	Plate 14	B09	38.2071
orf19.5226	WRS1	Plate 02	F06	38.1541
orf19.7563	BET2	Plate 11	C07	37.9182
orf19.4835		Plate 16	A07	35.9199
orf19.2444	CHS7	Plate 14	F12	35.8814
orf19.2560	CDC60	Plate 10	A10	35.4625
orf19.941	SEC14	Plate 02	G10	33.6617
orf19.6524	TOM40	Plate 15	H12	32.2076
orf19.2183	KRE30	Plate 14	D03	31.9138
orf19.661	KRR1	Plate 15	B10	30.7968
orf19.1280	SUI1	Plate 10	H02	30.1082
orf19.6642		Plate 15	F05	30.0553
orf19.1742	HEM3	Plate 15	C03	29.8049
orf19.2847		Plate 01	F02	28.7841
orf19.1849		Plate 20	H03	28.6396
orf19.2289	ARP3	Plate 10	E10	28.5722
orf19.801	TBF1	Plate 10	B11	28.5289
orf19.1402	CCT2	Plate 09	H02	28.3507
orf19.6151	ARC15	Plate 01	B12	27.5996
orf19.3251	ARC19	Plate 09	A05	27.2818
orf19.329		Plate 14	B06	26.9496
orf19.5746	ALA1	Plate 02	H11	26.7859
orf19.5184		Plate 07	H03	26.7473
orf19.3870	ADE13	Plate 17	E02	25.6977
orf19.2694	TYS1	Plate 07	G01	25.5436
orf19.1279	CDS1	Plate 15	E05	24.7876
orf19.2214		Plate 12	E10	23.762
orf19.4519	SUV3	Plate 20	G08	23.7476
orf19.978	BDF1	Plate 06	C02	23.5406
orf19.3234.1	SFT1	Plate 08	C09	23.2035
orf19.5064	MRPL3	Plate 20	E01	22.6642
orf19.1545		Plate 17	H09	22.3609
orf19.2601	HEM1	Plate 18	B05	21.9468
orf19.5906	ADE2	Plate 20	E04	21.8649
orf19.3647	SEC8	Plate 11	C01	21.7109
orf19.7062	RPA135	Plate 03	A08	21.0416
orf19.4479		Plate 08	C06	20.7671
orf19.5647	SUB2	Plate 15	H11	20.7527
orf19.6094	VPS53	Plate 04	B01	20.6853
orf19.1761	OST2	Plate 11	F11	20.483
orf19.2644	QCR2	Plate 21	E08	20.4782
orf19.6749	KRS1	Plate 15	C08	20.2182
orf19.5608		Plate 02	D02	20.1075
orf19.688		Plate 11	H12	19.886
orf19.4929		Plate 05	G07	19.5008
orf19.640		Plate 11	D07	19.4189
orf19.4931		Plate 11	E06	19.1156
orf19.4577.3	TIM10	Plate 07	G04	18.8267
orf19.1570	ERG7	Plate 10	F05	18.8267
orf19.5278	CMD2	Plate 05	C06	18.6437
orf19.144	SNU114	Plate 06	B04	18.61
orf19.1803	CDC43	Plate 16	F01	18.4896
orf19.6551		Plate 14	E02	18.4752
orf19.4016		Plate 21	B05	18.4222
orf19.1444		Plate 09	A12	18.2489
orf19.5959	NOP14	Plate 08	A01	18.0274
orf19.5657	SWI1	Plate 21	D10	17.8877
orf19.4060	ARO4	Plate 19	C07	17.5603
orf19.1220	RVS167	Plate 13	C01	17.2522
orf19.1352	TIM22	Plate 11	D10	17.127
orf19.6041	RPO41	Plate 17	D02	16.9103
orf19.5351	TIF11	Plate 11	G12	16.5829
orf19.269	SES1	Plate 15	C07	16.3999
orf19.2090		Plate 21	B12	16.0917
orf19.6903		Plate 11	E02	15.9906
orf19.6696	TIM9	Plate 15	D09	15.9521
orf19.2438		Plate 18	A07	15.7884
orf19.3064	MRPL27	Plate 07	E01	15.2587
orf19.6046	APC1	Plate 03	A04	14.9073
orf19.2275		Plate 09	E12	14.7917
orf19.7088		Plate 24	C04	14.7339
orf19.6373	DCP2	Plate 11	B02	14.7291
orf19.2688	NAN1	Plate 15	F02	14.4835
orf19.3367		Plate 05	B05	14.2572
orf19.3341		Plate 02	A05	14.0791
orf19.3970		Plate 11	A08	14.0165
orf19.4799		Plate 07	G10	14.0068
orf19.4841	SHY1	Plate 17	C03	14.002
orf19.5818	SUR2	Plate 14	G01	13.8142
orf19.2362		Plate 11	D11	13.482
orf19.4826	IDH1	Plate 17	C05	13.4676
orf19.7486	MRPL6	Plate 19	G05	13.405
orf19.1833		Plate 14	B12	13.275
orf19.5360	RPC11	Plate 01	C02	13.1401
orf19.5747		Plate 17	G01	12.8657
orf19.4620	TIM12	Plate 09	F05	12.7838
orf19.3696	TOM22	Plate 02	F10	12.7453
orf19.7678	ATP16	Plate 04	E01	12.6827
orf19.1646		Plate 16	A05	12.5431
orf19.3873	ARC40	Plate 07	H10	12.312
orf19.7215		Plate 03	B03	12.2879
orf19.6035		Plate 05	G06	12.2397
orf19.4040	ILV3	Plate 06	E10	12.182
orf19.5346		Plate 12	A02	12.129
orf19.5143	TIM54	Plate 02	C01	12.052
orf19.4176		Plate 05	B11	11.9653
orf19.930	PET9	Plate 15	E11	11.9027
orf19.2871	SDH12	Plate 06	F01	11.8545
orf19.6385	ACO1	Plate 17	E01	11.8256
orf19.3026	MAS1	Plate 14	B11	11.7775
orf19.585	MRPL17	Plate 03	E06	11.7438
orf19.5629	QCR7	Plate 03	D08	11.1419
orf19.5425		Plate 10	G04	11.1082
orf19.2977	MIA40	Plate 20	A08	10.8915
orf19.6738	VAN1	Plate 08	G02	10.8578
orf19.6541	RPL5	Plate 02	D08	10.5737
orf19.5850	NOC2	Plate 11	A11	10.5352
orf19.6314	RPB8	Plate 11	G09	10.5208
orf19.7011		Plate 07	C01	10.4919
orf19.7552		Plate 07	H07	10.4486
orf19.4035	PGA4	Plate 06	E09	10.1356
orf19.1966	BUD23	Plate 06	G12	10.0682
orf19.3609	UTP15	Plate 19	A01	9.99113
orf19.947	MRP17	Plate 05	D08	9.93335
orf19.4932		Plate 17	E04	9.92854
orf19.4499	RIM2	Plate 11	D09	9.89965
orf19.2418		Plate 05	F12	9.63482
orf19.4659		Plate 11	D08	9.57704
orf19.6740		Plate 06	H07	8.91739
orf19.6909		Plate 09	G10	8.84998
orf19.3348		Plate 13	C10	8.7922
orf19.1608		Plate 21	G04	8.72479
orf19.5356		Plate 15	G06	8.60441
orf19.2386		Plate 23	F05	8.54663
orf19.6417	TSR1	Plate 15	B02	8.47922
orf19.6355		Plate 07	G08	8.46478
orf19.1591	ERG10	Plate 01	F10	8.45515
orf19.2404		Plate 02	G09	8.407
orf19.2019		Plate 13	G08	8.26736
orf19.336	YAH1	Plate 11	C04	8.02661
orf19.7459		Plate 04	D08	8.01217
orf19.1480		Plate 21	D09	7.48733
orf19.6648	SDA1	Plate 11	B03	7.47289
orf19.1837	TBP1	Plate 14	H05	7.42474
orf19.6312	RPS3	Plate 10	G12	7.28992
orf19.1839	RPA190	Plate 02	H10	7.23214
orf19.1910		Plate 04	C04	7.10695
orf19.7618		Plate 15	A02	6.94805
orf19.706	NMD3	Plate 15	A05	6.88546
orf19.2934		Plate 05	B04	6.87583
orf19.1422	FZO1	Plate 04	B02	6.7073
orf19.2715	RPC53	Plate 12	B10	6.51951
orf19.6052	CNS1	Plate 12	B06	6.34136
orf19.2563		Plate 19	F02	6.31247
orf19.3938		Plate 12	D12	6.12468
orf19.927		Plate 05	G02	5.92245
orf19.3624	MSU1	Plate 05	D10	5.80208
orf19.6533	MSK1	Plate 17	D05	5.47466
orf19.7384	NOG1	Plate 01	F12	4.97871
orf19.2260		Plate 03	A02	4.86797
orf19.3585		Plate 22	D10	4.7187
orf19.7019	YML6	Plate 10	D04	4.37684
orf19.5168		Plate 11	A03	4.33832
orf19.3607		Plate 13	D02	3.9483
orf19.5198	NOP4	Plate 11	A02	3.88089
orf19.3300	ZPR1	Plate 09	G04	3.72681
orf19.5765		Plate 02	H06	3.25013
orf19.4154		Plate 15	E02	3.22124
orf19.4252		Plate 25	E02	2.889
orf19.5232	CSI2	Plate 14	H06	2.86493
orf19.5379	ERG4	Plate 01	G07	2.75418
orf19.6297		Plate 20	D08	2.57121
orf19.2407	DPS1-1	Plate 02	E05	2.41232
orf19.2760		Plate 02	B03	2.4075
orf19.6531	NUC2	Plate 23	A08	2.28713
orf19.2507	ARP9	Plate 15	G05	2.1812
orf19.5413		Plate 08	E03	2.10897
orf19.3937		Plate 05	D12	1.95971
orf19.4724		Plate 15	H09	1.86822
orf19.4093	PES1	Plate 08	E02	1.72377
orf19.1682		Plate 23	B07	1.70933
orf19.1305		Plate 15	B06	1.62266
orf19.3542	LEM3	Plate 17	B09	1.39635
orf19.6828		Plate 02	E11	0.996706
orf19.2115		Plate 25	F07	0.895591
orf19.2709	ZUO1	Plate 08	G05	0.30816
orf19.3304		Plate 12	B12	-1.62266
orf19.3324	TIF	Plate 16	B02	-1.70451
orf19.3778		Plate 15	H08	-2.13305
orf19.5010	DIM1	Plate 15	F08	-3.28383
orf19.6477		Plate 12	C11	-3.80385
orf19.6233		Plate 11	H04	-4.12164
orf19.5827	BUB2	Plate 23	B12	-6.24024

## Sheet: 54 hits <60% inhibtion GdA+DOX
Percent growth inhibition of strains in the presence of geldanamycin and DOX was calculated relative to the growth in the presence of DOX only
orf19	Common	Plate	Position	% growth inhibiton in DOX and GdA
orf19.3324	TIF	Plate 16	B02	60.0689
orf19.2507	ARP9	Plate 15	G05	57.8871
orf19.3064	MRPL27	Plate 07	E01	57.7008
orf19.2560	CDC60	Plate 10	A10	57.3063
orf19.4932		Plate 17	E04	57.1569
orf19.2934		Plate 05	B04	55.1488
orf19.1682		Plate 23	B07	53.8322
orf19.7088		Plate 24	C04	53.5282
orf19.7486	MRPL6	Plate 19	G05	53.2405
orf19.3304		Plate 12	B12	52.6453
orf19.2019		Plate 13	G08	52.2376
orf19.5747		Plate 17	G01	51.9053
orf19.6749	KRS1	Plate 15	C08	51.6433
orf19.4519	SUV3	Plate 20	G08	51.2237
orf19.4499	RIM2	Plate 11	D09	49.8118
orf19.6533	MSK1	Plate 17	D05	49.5532
orf19.5064	MRPL3	Plate 20	E01	48.8064
orf19.6355		Plate 07	G08	48.3367
orf19.1305		Plate 15	B06	48.1318
orf19.4931		Plate 11	E06	46.4151
orf19.4841	SHY1	Plate 17	C03	45.8948
orf19.688		Plate 11	H12	45.8517
orf19.5278	CMD2	Plate 05	C06	45.0155
orf19.3938		Plate 12	D12	44.0902
orf19.6035		Plate 05	G06	44.0734
orf19.947	MRP17	Plate 05	D08	43.4206
orf19.2709	ZUO1	Plate 08	G05	43.0488
orf19.3348		Plate 13	C10	42.1277
orf19.269	SES1	Plate 15	C07	38.8771
orf19.4060	ARO4	Plate 19	C07	38.6183
orf19.7019	YML6	Plate 10	D04	38.3596
orf19.2715	RPC53	Plate 12	B10	38.1469
orf19.5232	CSI2	Plate 14	H06	35.3188
orf19.2438		Plate 18	A07	32.7341
orf19.6477		Plate 12	C11	32.2612
orf19.2688	NAN1	Plate 15	F02	31.7673
orf19.585	MRPL17	Plate 03	E06	30.1264
orf19.1545		Plate 17	H09	29.2228
orf19.7459		Plate 04	D08	28.1558
orf19.3624	MSU1	Plate 05	D10	26.6007
orf19.2871	SDH12	Plate 06	F01	25.7833
orf19.2644	QCR2	Plate 21	E08	21.0288
orf19.930	PET9	Plate 15	E11	18.7742
orf19.2275		Plate 09	E12	18.1901
orf19.5425		Plate 10	G04	16.6672
orf19.3367		Plate 05	B05	16.656
orf19.4176		Plate 05	B11	7.42203
orf19.5226	WRS1	Plate 02	F06	6.15053
orf19.6385	ACO1	Plate 17	E01	4.2321
orf19.4826	IDH1	Plate 17	C05	4.05088
orf19.2214		Plate 12	E10	-0.0378945
orf19.3341		Plate 02	A05	-3.28954
orf19.4929		Plate 05	G07	-25.3074
orf19.2444	CHS7	Plate 14	F12	-29.58
